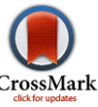

# Disparities in Cervical Cancer Mortality Rates as Determined by the Longitudinal Hyperbolastic Mixed-Effects Type II Model

Mohammad A. Tabatabai<sup>1</sup>, Jean-Jacques Kengwong-Keumo<sup>2</sup>, Wayne M. Eby<sup>3</sup>, Sejong Bae<sup>4</sup>, Juliette T. Guemmegne<sup>5</sup>, Upender Manne<sup>6</sup>, Mona Fouad<sup>4</sup>, Edward E. Partridge<sup>7</sup>, Karan P. Singh<sup>4\*</sup>

**1** School of Graduate Studies and Research, Meharry Medical College, Nashville, Tennessee, United States of America, **2** Department of Mathematics, Cameron University, Lawton, Oklahoma, United States of America, **3** Department of Mathematics, New Jersey City University, Jersey City, New Jersey, United States of America, **4** Division of Preventive Medicine and Comprehensive Cancer Center, University of Alabama at Birmingham, Birmingham, Alabama, United States of America, **5** Department of Economics, University of New Mexico, Albuquerque, New Mexico, United States of America, **6** Department of Pathology and Comprehensive Cancer Center, University of Alabama at Birmingham, Birmingham, Alabama, United States of America, **7** Department of Obstetrics & Gynecology and Comprehensive Cancer Center, University of Alabama at Birmingham, Birmingham, Alabama, United States of America

## Abstract

**Background:** The main purpose of this study was to model and analyze the dynamics of cervical cancer mortality rates for African American (Black) and White women residing in 13 states located in the eastern half of the United States of America from 1975 through 2010.

**Methods:** The cervical cancer mortality rates of the Surveillance, Epidemiology, and End Results (SEER) were used to model and analyze the dynamics of cervical cancer mortality. A longitudinal hyperbolastic mixed-effects type II model was used to model the cervical cancer mortality data and SAS PROC NL MIXED and Mathematica were utilized to perform the computations.

**Results:** Despite decreasing trends in cervical cancer mortality rates for both races, racial disparities in mortality rates still exist. In all 13 states, Black women had higher mortality rates at all times. The degree of disparities and pace of decline in mortality rates over time differed among these states. Determining the paces of decline over 36 years showed that Tennessee had the most rapid decline in cervical cancer mortality for Black women, and Mississippi had the most rapid decline for White Women. In contrast, slow declines in cervical cancer mortality were noted for Black women in Florida and for White women in Maryland.

**Conclusions:** In all 13 states, cervical cancer mortality rates for both racial groups have fallen. Disparities in the pace of decline in mortality rates in these states may be due to differences in the rates of screening for cervical cancers. Of note, the gap in cervical cancer mortality rates between Black women and White women is narrowing.

**Citation:** Tabatabai MA, Kengwong-Keumo J-J, Eby WM, Bae S, Guemmegne JT, et al. (2014) Disparities in Cervical Cancer Mortality Rates as Determined by the Longitudinal Hyperbolastic Mixed-Effects Type II Model. PLoS ONE 9(9): e107242. doi:10.1371/journal.pone.0107242

**Editor:** Kamalashwar Singh, Texas Tech University, United States of America

**Received:** July 17, 2014; **Accepted:** August 1, 2014; **Published:** September 16, 2014

**Copyright:** © 2014 Tabatabai et al. This is an open-access article distributed under the terms of the Creative Commons Attribution License, which permits unrestricted use, distribution, and reproduction in any medium, provided the original author and source are credited.

**Data Availability:** The authors confirm that all data underlying the findings are fully available without restriction. A public repository of the SEER (Surveillance, Epidemiology, and End Results) was utilized for the Cervical Data used in the paper. The reader is referred to the website: <http://seer.cancer.gov/>.

**Funding:** Funding was provided by National Cancer Institute of the National Institutes of Health (<http://www.cancer.gov/>) to the University of Alabama at Birmingham Comprehensive Cancer Center core support grant (P30 CA013148), National Cancer Institute of the National Institutes of Health (<http://www.cancer.gov/>) for the Cervical SPORE grant (P50CA098252), National Cancer Institute of the National Institutes of Health (<http://www.cancer.gov/>) for the Morehouse/Tuskegee University/UAB Comprehensive Cancer Center Partnership grant (2U54-CA118948), National Institute on Minority Health and Health Disparities of the National Institutes of Health (<http://www.nlmhd.nih.gov/>) for the Mid-South Transdisciplinary Collaborative Center for Health Disparities Research (U54MD008176). The funders had no role in study design, data collection and analysis, decision to publish, or preparation of the manuscript.

**Competing Interests:** The authors have declared that no competing interests exist.

\* Email: [kpsingh@uab.edu](mailto:kpsingh@uab.edu)

## Introduction

With proper screening and early intervention, cervical cancer, caused by infection with particular types of human papillomavirus (HPV), is a highly treatable disease. Because of the screening process and the long period for cancer development, it is also generally preventable. Mortality rates, which have been steadily decreasing with the advent of improved treatment/screening methods, provide a measure of the success in the treatment and/or screening modalities of cervical cancer. A primary focus in

modeling cervical cancer mortality rates is the disparity of these treatment/screening results among different races. In particular, we were interested in analyzing the disparity in cervical cancer mortality between White and African American (Black) women, and we performed a longitudinal study with respect to variation of these outcomes in 13 states. We expected to find differences in the mortality rates between these ethnic groups because of the issues of screening, socioeconomic status, education, access to treatment, general health, obesity, and other confounders. We also expected

to find variation in these confounders, at a smaller level, from state to state. For this reason, our longitudinal study was applied as a mixed-effects model.

Hyperbolic, logistic, and Gompertz models are applicable to biological modeling, including rates of survival, incidence, and mortality. The Gompertz model has been applied to assess differences in mortality rate increases between White and Black populations [1] and for genomic selection for longitudinal data [2]. These models are also applied in longitudinal studies wherein the mixed-effects models are routinely used. Novák et al. [3] applied the logistic growth model to longitudinal growth data for children and adolescents. Aggrey [4] reported a longitudinal study of growth weights using logistic mixed-effects models, and Li and Jiang [5] conducted a similar study to measure tree diameters.

Here, to analyze cervical cancer data, we applied the longitudinal hyperbolic of type II mixed-effects model (H2), previously utilized by Tabatabai *et al.* [6]. Hyperbolic models add flexibility of shape and have proven useful in various biomedical applications, including measuring cellular proliferation [7,8] and wound healing [9]. These models provide a flexible means to present mortality rates as a function of time and covariates. Hyperbolic models have been presented in a multivariable form, allowing the use of one or more additional explanatory variables [9,10]. In the present investigation, the H2 model was used to allow assessment of the inherent variability between individual subjects as well as within a subject.

To evaluate the role of race on the mortality rates for cervical cancer, a longitudinal study was performed for thirteen states available data in the eastern half of the USA. Such a longitudinal, multi-level study allows comparison of the relative importance of race in these states. It was expected that incidence and mortality rates would vary across different geographical regions due to differences in prevalence of HPV DNA in women in these states. The mixed-effects model allows for variability in some of the model parameters to account for the regional variation and, in addition, variation within each state over time. A mixed-effects model improves accuracy, and the built-in variability of these model parameters allows for the influence of factors other than race, not explicitly described in the model. These models were applied to data on the mortality rates for women with cervical cancer found in the Surveillance, Epidemiology, and End Result (SEER) program of the National Cancer Institute (NCI) [11].

Even though there is widespread use of screening (Pap smears and HPV DNA testing) to detect precancerous lesions of cervical cancer, racial disparities remain in both incidence and mortality rates, which are higher among Hispanic and Black women relative to White women. In fact, Black women have experienced the largest decreases in mortality rates since 1992 but still have rates more than twice that of White women [12]. With our model, we were able to view this long-term decrease in mortality rates and the corresponding racial disparities and also to measure the pace of decline in cervical cancer mortality as an assessment of disparity.

Since the risk of cervical cancer and racial disparity are associated with socioeconomic status and become relevant in studies correcting for comorbid conditions and other influences [25], we assessed the value of socioeconomic status in cervical cancer risk and its relation to other risk factors. We also report the findings of a study that applied the longitudinal H2 model to estimate the cervical cancer mortality rates for Black and White women in 13 states (Alabama, Florida, Georgia, Illinois, Louisiana, Maryland, Mississippi, New York, North Carolina, Pennsylvania, South Carolina, Tennessee, and Texas), which are located in the eastern half of the United States of America. In addition, for each

individual state, an analysis of disparities in cervical cancer mortality rates was performed.

## Methods

We applied the H2 model, which is useful to determine whether there are differences between individual states as well as differences within each state with regard to mortality rates. In general, a nonlinear mixed-effects model has a form

$$y_{ij} = f(\theta_i; X_{ij}) + \varepsilon_{ij},$$

where  $y_{ij}$  is the  $j$ th response on the  $i$ th subject,  $X_{ij}$  is the vector of covariates for the  $j$ th response on the  $i$ th subject,  $\varepsilon_{ij}$  is the normally distributed noise term,  $\alpha$  is a vector of fixed parameters, and  $b_i$  is the vector of random effects with mean vector 0 and variance-covariance matrix  $V$ . The vector  $\theta_i$  is defined as

$$\theta_i = A_i \alpha + B_i b_i,$$

where  $A_i$  and  $B_i$  are design matrices for  $\alpha$  and  $b_i$  respectively.

For the analysis of cervical cancer data, we used the H2 model, which has the form

$$y_{ij} = \frac{\theta_{i1} + \theta_{i6} \text{Race}_{ij}}{1 + \theta_{i2} \text{ArcSinh}(\text{Exp}[-\theta_{i3} \text{Time}_{ij}^{\theta_{i4}} + \theta_{i5} \text{Race}_{ij}])} + \varepsilon_{ij}, \quad (1)$$

where the covariate Race is 1 if the person is a White woman and 0 if she is a Black woman. The variable year here is denoted by Time. Time takes the value of 1 corresponds to the year 1975. The mixed- and the fixed-effects vectors,  $\alpha$  and  $b_i$ , for the cervical cancer data are

$$\alpha = \begin{bmatrix} \alpha_1 \\ \alpha_2 \\ \alpha_3 \\ \alpha_4 \\ \alpha_5 \\ \alpha_6 \end{bmatrix}$$

and

$$b_i = \begin{bmatrix} b_{i1} \\ b_{i2} \end{bmatrix}$$

and the design matrices are

$$A_i = \begin{bmatrix} 1 & 0 & 0 & 0 & 0 & 0 \\ 0 & 1 & 0 & 0 & 0 & 0 \\ 0 & 0 & 1 & 0 & 0 & 0 \\ 0 & 0 & 0 & 1 & 0 & 0 \\ 0 & 0 & 0 & 0 & 1 & 0 \\ 0 & 0 & 0 & 0 & 0 & 1 \end{bmatrix}$$

and

$$B_i = \begin{bmatrix} 1 & 0 \\ 0 & 1 \\ 0 & 0 \\ 0 & 0 \\ 0 & 0 \\ 0 & 0 \end{bmatrix}$$

with

$$\theta_i = \begin{bmatrix} \theta_{i1} \\ \theta_{i2} \\ \theta_{i3} \\ \theta_{i4} \\ \theta_{i5} \\ \theta_{i6} \end{bmatrix} = \begin{bmatrix} \alpha_1 + b_{i1} \\ \alpha_2 + b_{i2} \\ \alpha_3 \\ \alpha_4 \\ \alpha_5 \\ \alpha_6 \end{bmatrix}$$

Use of the above information results in the following equation

$$y_{ij} = \frac{\alpha_1 + b_{i1} + \alpha_6 Race_{ij}}{1 + (\alpha_2 + b_{i2}) ArcSinh(Exp[-\alpha_3 Time_{ij}^2 + \alpha_5 Race_{ij}])} + \varepsilon_{ij}(2)$$

We assumed that the random effects vector  $b_i$  has a bivariate normal distribution with mean vector  $\begin{bmatrix} 0 \\ 0 \end{bmatrix}$  and variance-covariance matrix  $V = \begin{pmatrix} \sigma_{11} & \sigma_{12} \\ \sigma_{21} & \sigma_{22} \end{pmatrix}$ .

When  $\theta_{i5} = \theta_{i6} = 0$ , the model becomes the H2 model [6]. SAS (Cary, NC) code for analysis with the H2 model is available upon request.

### Results

To eliminate disparities, there is a need (a) to understand the dynamics of mortality for individual states as well as for all states as a whole; (b) to know how fast the mortality rate due to cervical cancer changes with respect to time; (c) to assess, for different groups, whether the gap is widening or narrowing at different points in time; and (d) to identify factors that contribute to the pace of decline. **Tables 1 and 2** give the summary statistics on the cervical cancer mortality rates of the 13 states for Blacks and Whites, respectively. As defined by the NCI, the mortality rate is

$$\text{Cervix Mortality Rate} = \frac{100,000(\text{Number of Cervix Cancer Deaths})}{\text{Number of Female Population}}$$

The data used for the construction of **Tables 1 and 2** are the mortality rates for each state over 36 years, starting with 1975 and ending with 2010.

**Tables 3 and 4** show cervical cancer summary statistics for 1975-2010 for Blacks and Whites. In constructing these tables, we took into account the cervical cancer mortality rates for all 13 states. For each year, we give summary statistics for the cervical cancer mortality rates of these states.

**Table 1.** Summary statistics for Black cervical cancer mortality rates in thirteen U.S. states from 1975 to 2010.

| State | Mean | Standard deviation | CV    | Minimum | Lower quartile | Median | Upper quartile | Maximum |
|-------|------|--------------------|-------|---------|----------------|--------|----------------|---------|
| AL    | 9.30 | 4.05               | 43.55 | 4.10    | 5.65           | 8.45   | 11.85          | 17.80   |
| FL    | 8.94 | 3.51               | 39.26 | 4.00    | 5.50           | 8.75   | 12.05          | 14.90   |
| GA    | 7.46 | 3.17               | 42.49 | 3.60    | 4.70           | 6.80   | 9.25           | 15.40   |
| IL    | 8.74 | 2.82               | 32.27 | 4.60    | 6.25           | 8.50   | 11.10          | 14.40   |
| LA    | 8.06 | 2.61               | 32.38 | 3.90    | 5.80           | 8.10   | 9.60           | 13.70   |
| MD    | 6.80 | 3.11               | 45.74 | 2.90    | 4.15           | 6.30   | 8.10           | 14.80   |
| MS    | 8.72 | 2.21               | 25.34 | 4.70    | 7.20           | 8.60   | 10.30          | 13.40   |
| NY    | 7.33 | 3.04               | 41.47 | 3.20    | 5.05           | 6.40   | 8.85           | 14.90   |
| NC    | 8.45 | 4.30               | 0.89  | 3.40    | 4.25           | 8.15   | 10.45          | 19.50   |
| PA    | 6.78 | 2.33               | 34.37 | 2.70    | 5.35           | 6.80   | 8.15           | 11.80   |
| SC    | 8.54 | 3.23               | 37.82 | 4.10    | 5.65           | 8.00   | 10.90          | 15.70   |
| TN    | 9.02 | 3.20               | 35.48 | 3.20    | 6.20           | 8.85   | 11.25          | 17.30   |
| TX    | 7.67 | 2.48               | 32.33 | 3.70    | 5.70           | 7.70   | 9.15           | 13.80   |

Mortality rates were calculated as defined in the text.  
doi:10.1371/journal.pone.0107242.t001

**Table 2.** Summary statistics for White cervical cancer mortality rates in 13 U.S. states from 1975 to 2010.

| State | Mean | Standard deviation | CV    | Minimum | Lower quartile | Median | Upper quartile | Maximum |
|-------|------|--------------------|-------|---------|----------------|--------|----------------|---------|
| AL    | 3.45 | 1.14               | 33.04 | 2.00    | 2.55           | 3.00   | 4.55           | 6.00    |
| FL    | 3.02 | 0.72               | 23.84 | 2.10    | 2.35           | 3.00   | 3.40           | 5.50    |
| GA    | 3.43 | 0.74               | 21.57 | 2.40    | 2.90           | 3.30   | 3.70           | 4.60    |
| IL    | 3.09 | 0.71               | 22.98 | 2.10    | 2.50           | 3.00   | 3.60           | 5.20    |
| LA    | 2.86 | 0.72               | 25.17 | 1.60    | 2.50           | 2.75   | 3.25           | 6.20    |
| MD    | 2.82 | 1.13               | 40.07 | 1.40    | 2.05           | 2.40   | 3.25           | 5.20    |
| MS    | 2.90 | 0.74               | 25.52 | 1.70    | 2.45           | 2.80   | 3.20           | 4.40    |
| NY    | 3.00 | 0.69               | 23    | 1.80    | 2.35           | 3.05   | 3.45           | 4.90    |
| NC    | 2.91 | 0.85               | 29.21 | 1.60    | 2.25           | 2.75   | 3.60           | 4.70    |
| PA    | 2.92 | 0.70               | 23.97 | 1.80    | 2.40           | 2.95   | 3.30           | 5.10    |
| SC    | 3.12 | 1.00               | 32.05 | 1.30    | 2.40           | 2.95   | 4.00           | 6.00    |
| TN    | 3.57 | 1.04               | 29.13 | 1.90    | 2.90           | 3.30   | 4.15           | 5.10    |
| TX    | 3.45 | 0.61               | 17.68 | 2.50    | 3.00           | 3.50   | 3.65           | 5.50    |

Mortality rates were calculated as defined in the text.  
doi:10.1371/journal.pone.0107242.t002

Use of formula (2) and SAS PROC NLMIXED enabled us to perform the H2 model. The output is summarized in **Table 5**. The variance covariance matrix for the mixed-effects model is given by

$$\hat{V} = \begin{pmatrix} 1.5196 & 96.7737 \\ 96.7737 & 18816 \end{pmatrix}.$$

**Table 5** shows that all parameters in the model are highly significant.

**Figure 1** shows 3D bar graphs for cervical cancer mortality of all 13 states during the entire period of 1975–2010, and **Figure 2** shows 3D bar graphs for the pace of decline in cervical mortality rates for all 13 states. **Figure 3** shows a graph of the actual lines for mortality rates in all 13 states. The top portion of the graph represents the cervical cancer mortality for Black women, and the lower portion shows the mortality for White women. **Figure 4** shows the curves for Black women fitted for all 13 states by use of the H2 model and SAS PROC NLMIXED; **Figure 5** shows similar curves for White women. **Figure 6** shows the fitted curves for the average of all 13 states for Black women and White women.

#### State-level analyses of cervical cancer mortality rates

**Alabama.** For Alabama, the cervical cancer mortality rates for both Whites and Blacks declined during the period of 1975–2010 (**Figure 7**). Alabama ranked highest among the 13 states in mean cervical cancer mortality for Blacks and had the third highest mortality for Whites. Also, Alabama had the third highest rate in mean pace of decline in mortality for both races. Over the 36 years, the mean mortality rate was 9.30 for Blacks and 3.45 for Whites. In this time, the cervical cancer mortality rates decreased for both races. **Figure 7** illustrates the mortality trends as well as the pace of decline in mortality. The mortality rate for Black women in Alabama ranged from a high of 17.80 to a low of 4.10. The estimated median cervical cancer mortality rate for Blacks and Whites in Alabama was 8.45 and 3.00, respectively. The pace of the decline in mortality rates for Blacks rose until reaching its top pace of 0.60 in 1979. After that year, the pace fell. For White Alabamans, the pace of decline in cervical cancer mortality rose until 1986, at which time the maximum pace of 0.176 was reached; thereafter, the pace of decline in mortality fell. In 1975, the mortality rate for Blacks was approximately three times that for Whites. The gap narrowed steadily after 1975, and in 2010 the mortality rate for Blacks became twice that for Whites. The pace of decline in the mortality curve for Blacks stayed above that for Whites throughout the period. Thus, although the gap in mortality rates in Alabama has narrowed, a disparity remains.

**Florida.** In Florida from 1975 to 2010, despite a decline in cervical cancer mortality rates for Whites and Blacks, Blacks continued to suffer the greatest burden (**Figure 8**). Compared to the other states, Florida had the third highest rate in mean cervical cancer mortality for Blacks and seventh highest for Whites. Also, Florida had the thirteenth highest rate in mean pace of decline in cervical cancer mortality for Black women and the tenth highest for White women. In 36 years, Florida had mean mortality rates of 8.94 for Blacks and 3.43 for Whites. For both Whites and Blacks, the state had the third highest mean mortality rate among all 13 states. The mortality rate for Blacks ranged from a low of 4.00 to a high of 14.90. For Whites, it ranged from 2.10 to 5.50. For White women, the pace of decline in mortality decreased steadily after 1975 (**Figure 2**). For Blacks, the pace of decline increased until 1992, at which time it reached its maximum value; from 1992 until

**Table 3.** Summary statistics Black cervical cancer mortality by year in thirteen U.S. states.

| Year | Mean  | Standard deviation | CV    | Minimum | Lower quartile | Median | Upper quartile | Maximum |
|------|-------|--------------------|-------|---------|----------------|--------|----------------|---------|
| 1975 | 13.95 | 2.61               | 18.71 | 9.70    | 12.40          | 13.80  | 14.90          | 17.70   |
| 1976 | 12.95 | 2.73               | 21.09 | 9.40    | 11.20          | 12.10  | 14.70          | 19.50   |
| 1977 | 12.88 | 2.22               | 17.24 | 9.60    | 11.60          | 13.00  | 14.40          | 17.80   |
| 1978 | 12.90 | 2.35               | 18.22 | 8.50    | 11.80          | 12.40  | 14.60          | 17.70   |
| 1979 | 10.75 | 2.44               | 22.7  | 6.90    | 9.00           | 10.20  | 13.00          | 14.40   |
| 1980 | 11.46 | 2.10               | 18.33 | 8.70    | 9.50           | 11.70  | 13.00          | 14.40   |
| 1981 | 10.38 | 2.07               | 19.95 | 7.70    | 8.90           | 10.00  | 11.60          | 14.40   |
| 1982 | 10.46 | 2.06               | 19.7  | 7.20    | 8.30           | 10.70  | 11.80          | 13.50   |
| 1983 | 10.56 | 1.92               | 18.19 | 7.40    | 8.40           | 11.30  | 11.50          | 13.40   |
| 1984 | 10.44 | 1.69               | 16.19 | 7.70    | 9.40           | 10.30  | 11.60          | 13.00   |
| 1985 | 9.75  | 1.72               | 17.65 | 7.10    | 8.20           | 9.70   | 11.30          | 12.00   |
| 1986 | 10.18 | 1.90               | 18.67 | 7.10    | 8.80           | 10.10  | 11.10          | 13.80   |
| 1987 | 8.72  | 1.61               | 18.47 | 6.20    | 7.80           | 8.80   | 9.50           | 11.80   |
| 1988 | 8.52  | 2.14               | 25.12 | 5.00    | 7.50           | 8.00   | 9.90           | 11.80   |
| 1989 | 9.15  | 2.17               | 23.72 | 6.10    | 7.90           | 8.60   | 10.30          | 13.20   |
| 1990 | 8.31  | 1.53               | 18.42 | 5.00    | 7.50           | 8.50   | 8.70           | 10.90   |
| 1991 | 8.19  | 1.44               | 17.59 | 6.30    | 7.60           | 7.90   | 8.70           | 11.40   |
| 1992 | 8.93  | 1.99               | 22.29 | 5.70    | 7.10           | 9.10   | 10.30          | 12.00   |
| 1993 | 8.54  | 1.21               | 14.17 | 7.00    | 7.50           | 8.30   | 9.30           | 10.70   |
| 1994 | 7.38  | 1.10               | 14.91 | 5.50    | 6.80           | 7.60   | 8.10           | 8.80    |
| 1995 | 7.74  | 1.52               | 19.64 | 5.50    | 6.60           | 7.90   | 8.40           | 11.20   |
| 1996 | 6.75  | 1.33               | 19.71 | 5.00    | 5.70           | 6.20   | 8.00           | 8.90    |
| 1997 | 7.05  | 0.93               | 13.2  | 6.00    | 6.40           | 6.90   | 7.80           | 8.70    |
| 1998 | 6.23  | 0.98               | 15.74 | 4.90    | 5.50           | 6.20   | 6.90           | 8.00    |
| 1999 | 5.80  | 1.16               | 20    | 3.80    | 5.30           | 6.00   | 6.40           | 8.20    |
| 2000 | 6.00  | 1.61               | 26.84 | 3.30    | 5.20           | 5.80   | 7.60           | 8.40    |
| 2001 | 5.18  | 1.40               | 27.03 | 3.20    | 4.10           | 4.70   | 5.70           | 8.00    |
| 2002 | 5.51  | 0.99               | 17.97 | 3.90    | 4.70           | 5.60   | 6.10           | 7.40    |
| 2003 | 5.15  | 1.32               | 25.64 | 3.50    | 3.90           | 5.20   | 5.70           | 8.20    |
| 2004 | 5.25  | 1.06               | 20.2  | 3.80    | 4.40           | 5.50   | 5.70           | 7.60    |
| 2005 | 4.95  | 1.02               | 20.61 | 3.10    | 4.60           | 4.80   | 5.60           | 6.90    |
| 2006 | 4.85  | 1.34               | 27.63 | 3.40    | 4.30           | 4.50   | 5.20           | 8.60    |
| 2007 | 4.68  | 1.26               | 26.93 | 2.70    | 4.00           | 4.50   | 5.00           | 8.00    |
| 2008 | 4.72  | 1.22               | 25.85 | 3.20    | 3.70           | 4.70   | 5.60           | 7.00    |
| 2009 | 4.55  | 0.75               | 16.49 | 3.60    | 4.10           | 4.40   | 4.70           | 6.40    |
| 2010 | 4.20  | 0.99               | 23.58 | 2.90    | 3.60           | 3.90   | 4.90           | 6.20    |

Mortality rates were calculated as defined in the text.  
doi:10.1371/journal.pone.0107242.t003

**Table 4.** Summary statistics White cervical cancer mortality by year in thirteen U.S. states.

| Year | Mean | Standard deviation | CV    | Minimum | Lower quartile | Median | Upper quartile | Maximum |
|------|------|--------------------|-------|---------|----------------|--------|----------------|---------|
| 1975 | 4.88 | 0.75               | 15.37 | 3.90    | 4.40           | 4.70   | 5.10           | 6.20    |
| 1976 | 4.78 | 0.58               | 12.14 | 3.90    | 4.40           | 4.70   | 5.20           | 5.60    |
| 1977 | 4.37 | 0.73               | 16.71 | 3.10    | 4.10           | 4.30   | 4.60           | 5.90    |
| 1978 | 4.35 | 0.54               | 12.42 | 3.60    | 4.10           | 4.30   | 4.30           | 5.30    |
| 1979 | 3.97 | 0.69               | 17.39 | 3.00    | 3.60           | 3.90   | 4.20           | 5.30    |
| 1980 | 3.88 | 0.74               | 19.08 | 2.40    | 3.50           | 3.80   | 4.20           | 5.00    |
| 1981 | 3.79 | 0.40               | 10.56 | 3.20    | 3.50           | 3.80   | 4.00           | 4.50    |
| 1982 | 3.58 | 0.72               | 20.12 | 2.30    | 3.40           | 3.50   | 3.90           | 4.70    |
| 1983 | 3.52 | 0.52               | 14.78 | 2.90    | 3.10           | 3.40   | 4.00           | 4.60    |
| 1984 | 3.65 | 0.78               | 21.37 | 2.10    | 3.30           | 3.60   | 3.70           | 5.40    |
| 1985 | 3.41 | 0.47               | 13.79 | 2.40    | 3.30           | 3.40   | 3.60           | 4.20    |
| 1986 | 3.19 | 0.58               | 18.19 | 2.00    | 3.10           | 3.20   | 3.50           | 4.00    |
| 1987 | 3.36 | 0.64               | 19.05 | 2.40    | 3.10           | 3.30   | 3.60           | 4.90    |
| 1988 | 3.08 | 0.52               | 16.89 | 2.20    | 2.80           | 3.10   | 3.30           | 4.20    |
| 1989 | 3.11 | 0.47               | 15.12 | 2.60    | 2.90           | 3.00   | 3.10           | 4.50    |
| 1990 | 3.08 | 0.45               | 14.62 | 2.30    | 2.70           | 3.10   | 3.50           | 3.70    |
| 1991 | 2.96 | 0.34               | 11.49 | 2.20    | 2.90           | 3.00   | 3.10           | 3.50    |
| 1992 | 3.06 | 0.42               | 13.73 | 2.40    | 2.80           | 3.00   | 3.30           | 3.80    |
| 1993 | 3.03 | 0.41               | 13.54 | 2.40    | 2.80           | 3.00   | 3.30           | 3.70    |
| 1994 | 3.15 | 0.45               | 14.29 | 2.70    | 2.90           | 3.00   | 3.30           | 4.20    |
| 1995 | 2.83 | 0.41               | 14.49 | 2.10    | 2.60           | 2.80   | 3.10           | 3.50    |
| 1996 | 2.85 | 0.33               | 11.58 | 2.40    | 2.70           | 2.90   | 3.10           | 3.50    |
| 1997 | 2.97 | 0.45               | 15.16 | 2.50    | 2.70           | 2.80   | 3.20           | 4.10    |
| 1998 | 2.78 | 0.48               | 17.27 | 1.90    | 2.60           | 2.90   | 3.10           | 3.70    |
| 1999 | 2.72 | 0.33               | 12.14 | 2.00    | 2.60           | 2.70   | 2.90           | 3.30    |
| 2000 | 2.54 | 0.54               | 21.26 | 1.30    | 2.40           | 2.50   | 2.90           | 3.50    |
| 2001 | 2.49 | 0.40               | 16.07 | 1.80    | 2.30           | 2.40   | 2.70           | 3.10    |
| 2002 | 2.45 | 0.45               | 18.37 | 1.70    | 2.20           | 2.30   | 2.70           | 3.40    |
| 2003 | 2.25 | 0.56               | 24.89 | 1.40    | 1.90           | 2.20   | 2.40           | 3.50    |
| 2004 | 2.26 | 0.54               | 23.9  | 1.40    | 1.90           | 2.20   | 2.40           | 3.30    |
| 2005 | 2.35 | 0.41               | 17.45 | 1.50    | 2.20           | 2.40   | 2.70           | 2.90    |
| 2006 | 2.31 | 0.41               | 17.75 | 1.80    | 2.00           | 2.30   | 2.50           | 3.10    |
| 2007 | 2.35 | 0.36               | 15.32 | 1.70    | 2.10           | 2.40   | 2.50           | 2.90    |
| 2008 | 2.38 | 0.39               | 16.39 | 1.80    | 2.10           | 2.40   | 2.70           | 3.00    |
| 2009 | 2.25 | 0.51               | 22.67 | 1.70    | 2.10           | 2.10   | 2.40           | 3.70    |
| 2010 | 2.24 | 0.40               | 17.86 | 1.60    | 2.00           | 2.30   | 2.50           | 2.90    |

Mortality rates were calculated as defined in the text.  
doi:10.1371/journal.pone.0107242.t004

**Table 5.** Parameter estimates for the generalized H2 model (SAS output).

| Parameter estimates |          |         |    |         |         |       |         |         |          |  |
|---------------------|----------|---------|----|---------|---------|-------|---------|---------|----------|--|
| Parameter           | Estimate | SE      | DF | t-value | P-value | Alpha | Lower   | Upper   | Gradient |  |
| $\alpha_1$          | 13.1361  | 0.3877  | 24 | 33.89   | <.0001  | 0.05  | 12.3360 | 13.9361 | 0.000811 |  |
| $\alpha_2$          | 553.72   | 103.74  | 24 | 5.34    | <.0001  | 0.05  | 339.62  | 767.82  | 0.005632 |  |
| $\alpha_3$          | 12.6426  | 0.4053  | 24 | 31.20   | <.0001  | 0.05  | 11.8062 | 13.4790 | 0.001518 |  |
| $\alpha_4$          | -0.2230  | 0.01105 | 24 | -20.18  | <.0001  | 0.05  | -0.2457 | -0.2002 | 0.019119 |  |
| $\alpha_5$          | -0.5316  | 0.1402  | 24 | -3.79   | 0.0009  | 0.05  | -0.8210 | -0.2421 | -0.00066 |  |
| $\alpha_6$          | -8.7847  | 0.5171  | 24 | -16.99  | <.0001  | 0.05  | -9.8520 | -7.7173 | 0.000311 |  |
| $\sigma_{11}$       | 1.5196   | 0.4481  | 24 | 3.39    | 0.0024  | 0.05  | 0.5947  | 2.4445  | -0.00011 |  |
| $\sigma_{22}$       | 18816    | 1.6293  | 24 | 11548.6 | <.0001  | 0.05  | 18813   | 18820   | -0.00014 |  |
| $\sigma_{12}$       | 96.7737  | 31.6337 | 24 | 3.06    | 0.0054  | 0.05  | 31.4849 | 162.06  | -0.00004 |  |
| $\sigma^2$          | 1.0442   | 0.04962 | 24 | 21.05   | <.0001  | 0.05  | 0.9418  | 1.1467  | -0.00014 |  |

doi:10.1371/journal.pone.0107242.t005

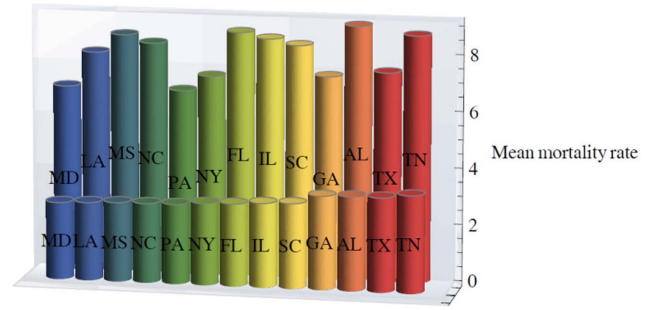

**Figure 1.** Mean mortality rates for White (front row) and Black (back row) women for the thirteen U.S. states from 1975 through 2010. Mortality rates were calculated as defined in the text. doi:10.1371/journal.pone.0107242.g001

2010, the pace of decline had a downward trend. During 1975–1983, pace of decline in Whites was higher than that for Blacks. In 1983, both races had an equal pace of decline of 0.082. In 1975, the cervical cancer mortality rate for Blacks was three times that for Whites, but in 2010 the rate for Blacks was only 2.4 times that for Whites.

**Georgia.** For 1975–2010, Georgia had a steady decrease in mortality rates for both Blacks and Whites (Figure 9). The mean mortality rate for Blacks was 7.46 and 3.43 for Whites. Georgia had the third highest cervical cancer mortality rate among the 13 states studied. Over 36 years, the median cervical cancer mortality rate for Blacks was 6.80; for Whites, the rate was 3.30. In 1975, the mortality rate for Blacks was 3 times that for Whites, but, in 2010, it was reduced to 1.7 times that for Whites. From 1975 through 1979, the pace of decline in cervical cancer mortality for Whites was greater than that for Blacks (Figure 3). In 1979, Blacks and Whites had the same pace of decline, 0.1391. After 1979, the decline in mortality for Blacks was higher than that for Whites. From 1975 through 1989, the pace of decline in mortality for Blacks increased. In 1989, it reached a maximum and declined afterwards. Of the states studied, Georgia had the tenth highest rate in cervical cancer mortality for Blacks and the fourth highest mortality for Whites. Also, Georgia had the fifth highest mean pace of decline in the mortality rate for Blacks and eighth highest for Whites.

**Illinois.** In Illinois, from 1975 through 2010, the cervical cancer mortality rates for both races had downward slopes (Figure 10). In 1975, the rate for Blacks was 2.75 times that for Whites, but in 2010 it was reduced to 2.60. In 1975, Blacks had a mortality rate of 12.1; in 2010, it was 5.7. For Whites in 1975, the cervical cancer mortality rate was 4.4; in 2010, it was 2.2. In 36 years, the cervical cancer mortality rate for Blacks dropped by 53%; for Whites, the decrease was 50%. In 1975, the pace of decline in the mortality rate for Blacks began an upward trend that

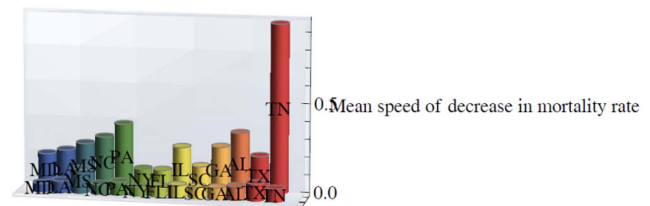

**Figure 2.** Mean pace of decrease in mortality rates for White (front row) and Black (back row) women for the thirteen U.S. states from 1975 through 2010. doi:10.1371/journal.pone.0107242.g002

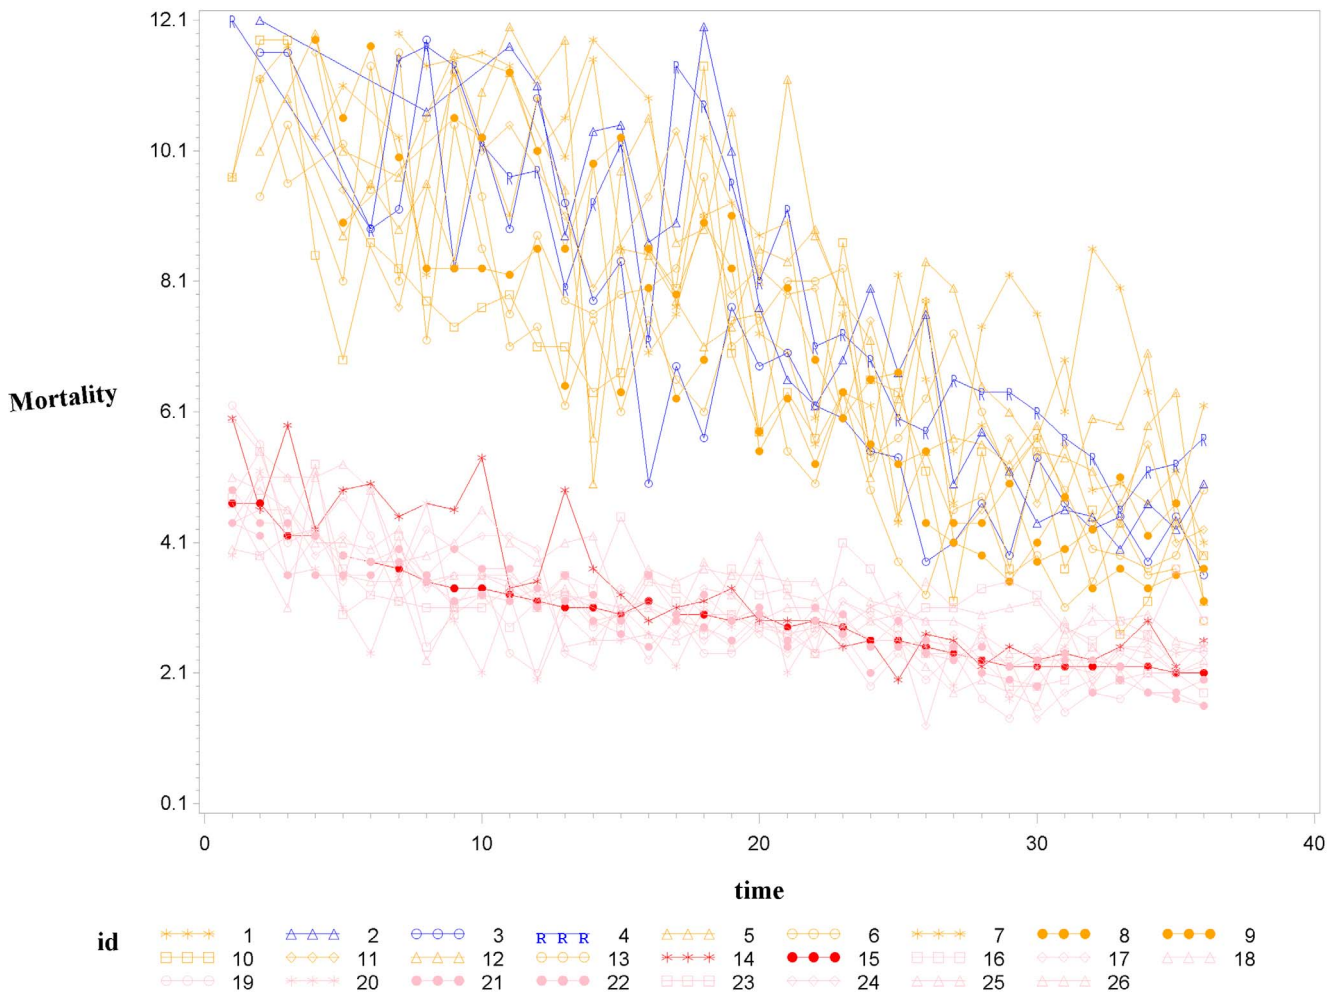

**Figure 3. Actual data for cervical cancer mortality rates for Black and White women.**  
doi:10.1371/journal.pone.0107242.g003

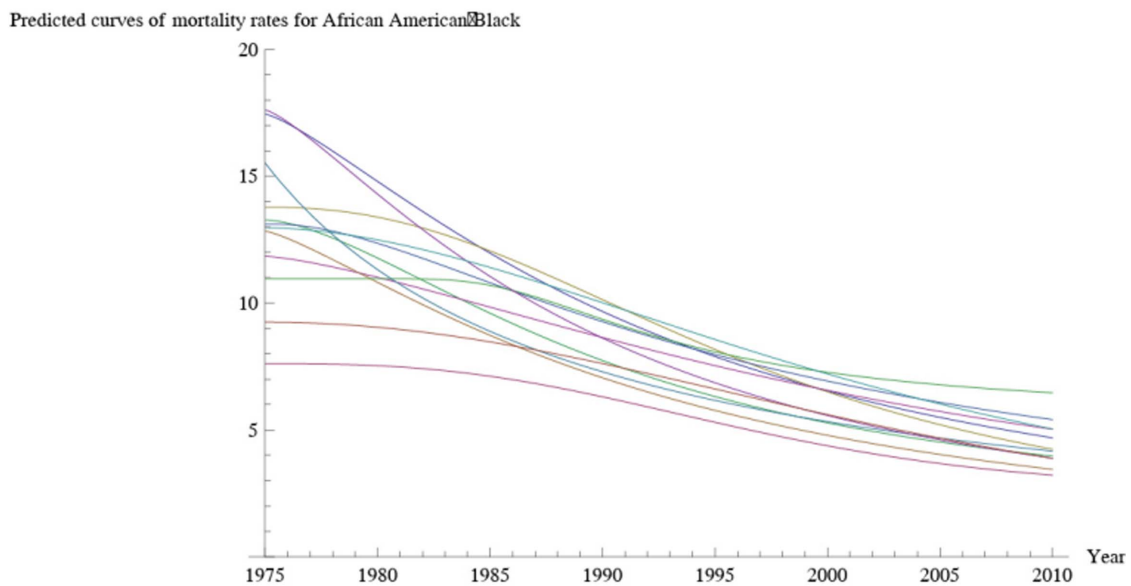

**Figure 4. Predicted values for cervical cancer mortality rates for Black women.**  
doi:10.1371/journal.pone.0107242.g004



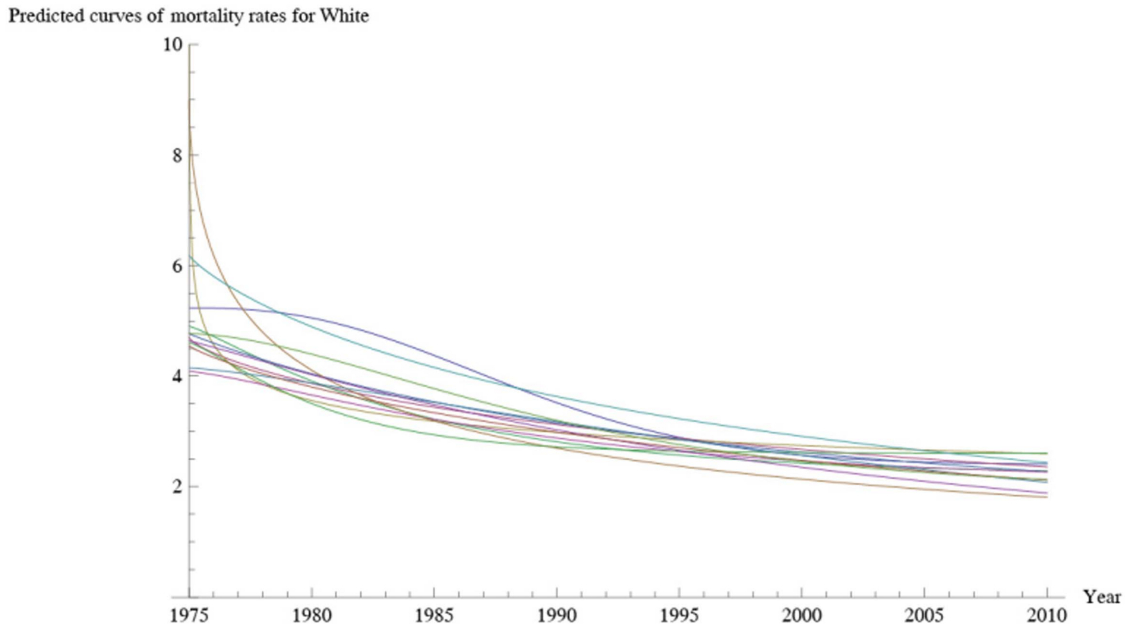

**Figure 5. Predicted data values for cervical cancer mortality rates for White women.**  
doi:10.1371/journal.pone.0107242.g005

continued until 1981. Thereafter, the pace of decline fell. For Whites, there was an early rise, but after 1976 it had a downward trend. For the entire time, the pace of decline for Blacks was higher than that for Whites. The mean mortality rate was 8.74, and the median was 8.50. Compared to the other states, Illinois had the fourth highest rate in cervical cancer mortality for Blacks and the sixth highest mortality for Whites. Also, Illinois had the seventh highest rate in mean pace of decline in mortality for Blacks and the sixth highest for Whites.

**Louisiana.** Cervical cancer mortality trends for both Blacks and Whites in Louisiana followed a downward slope throughout the 36 years, but Blacks consistently had a higher rate than Whites (**Figure 11**). In 1975, the rate for Blacks was 3.1 times that for Whites, but in 2010 it was only 1.5 times. From 1975 to 1977, Whites had higher pace of decline in mortality relative to Blacks. After 1977, the trend reversed, and Blacks had higher pace of mortality. This trend continued until 2010. In 1977, the pace of decline for both Whites and Blacks was 0.1463. The pace of

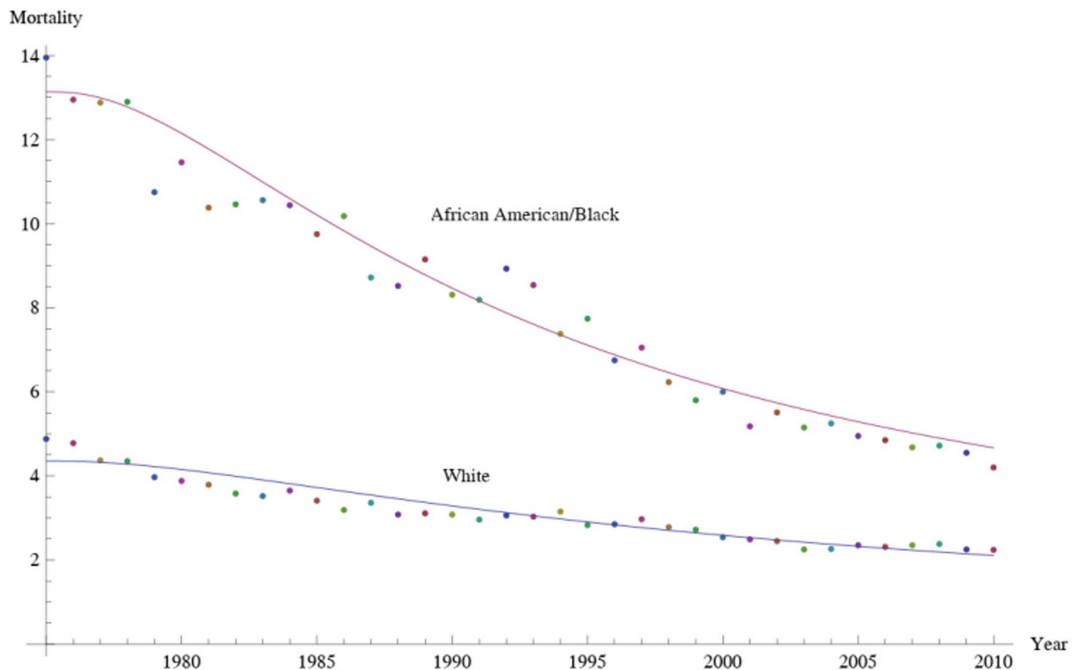

**Figure 6. Cervical cancer mortality rates for Black and White women as determined by the H2 model.**  
doi:10.1371/journal.pone.0107242.g006

### Cervical Cancer in Alabama for African American/Black and White:1975-2010

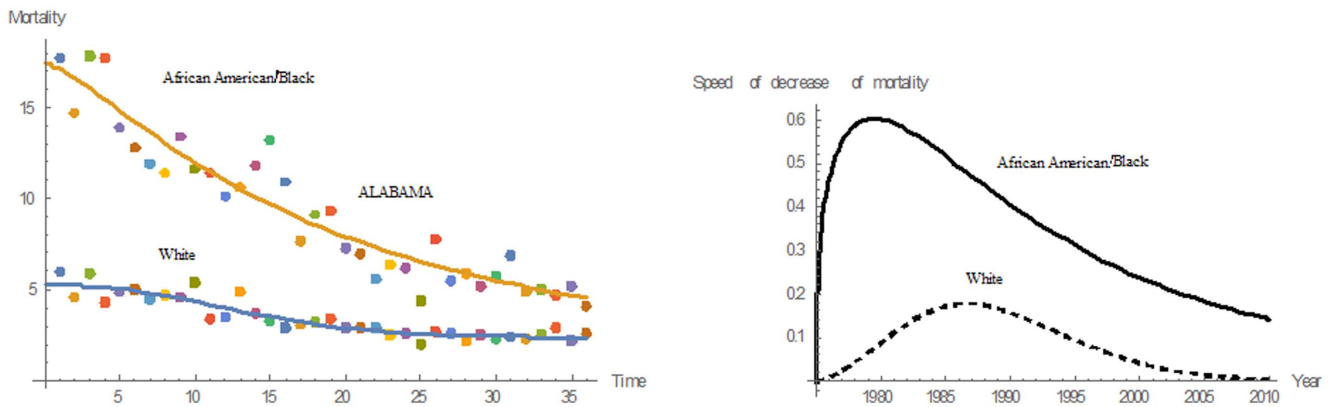

**Figure 7. Mean mortality rates, pace of decrease, and 3D histograms for Black and White women in Alabama, 1975–2010.**  
doi:10.1371/journal.pone.0107242.g007

decline for Blacks rose until reaching a maximum in 1983. After 1983, the mortality continued to fall. The decrease in mortality rate in 1975–2010 for Blacks was 69%; for Whites it was 35%. The mean mortality rate was 8.06, and the median was 8.10. Relative to the other states, Louisiana had the eighth highest rate for Blacks and twelfth highest for Whites. Also, Louisiana had the ninth highest rate in the mean pace of decline in cervical cancer mortality for Blacks and seventh highest for Whites.

**Maryland.** During 1975–2010, Maryland had decreasing cervical cancer mortality rates for both Blacks and Whites (**Figure 12**). In 1975, the rate for Blacks was 14.8; in 2010, it was 2.9, an 80% decrease. In 1975, Whites had a mortality rate of 6.2; in 2010, it was 1.6, a 74% reduction. In 1975, the pace of decline in rates for both Blacks and Whites began to rise. For Blacks, this upward trend continued until 1984, at which time the pace of decline reached its maximum of 0.2427. For Whites, the rise continued until it its maximum of 0.0961 in 1978. After 1978, there was a downward trend. Maryland had a mean cervical cancer mortality rate of 6.80 and a median cervical cancer mortality rate of 6.30. Relative to the other states, Maryland had the twelfth highest rate in mean cervical cancer mortality for Blacks and the thirteenth highest mean mortality for Whites. Also,

Maryland had the tenth highest rate in mean pace of decline in cervical cancer mortality for Blacks and the thirteenth highest for Whites.

**Mississippi.** For Mississippi, the cervical cancer mortality rates for both races had decreasing slopes during 1975–2010 (**Figure 13**). In 1975, the mortality rates for Blacks and Whites were 9.7 and 3.9, respectively. In 2010, these numbers were 6.2 for Blacks and 2.5 for Whites. These represent a 36% reduction for Blacks and 36% reduction for Whites. In 1975, the mortality rate for Blacks was 2.5 times that for Whites. During 1975–1978, the pace of decline in the mortality rate for Whites was higher than that for Blacks. In 1978, both Blacks and Whites had the same pace of decline, 0.4419. During 1978–2010, the pace of decline for Blacks was higher than that for Whites. The maximum pace of decline in cervical cancer mortality for Blacks was 0.4513. Mississippi had a mean mortality rate of 8.72 and a median mortality rate of 8.60. This median mortality rate was the third highest for Blacks among the thirteen states. Mississippi had the fifth highest rate in mean cervical cancer mortality rate for Blacks and the eleventh highest for Whites. Also, Mississippi had the sixth highest rate in pace of decline in cervical cancer mortality rate for Blacks and the highest decline for Whites.

### Cervical Cancer in Florida for African American/Black and White:1975-2010

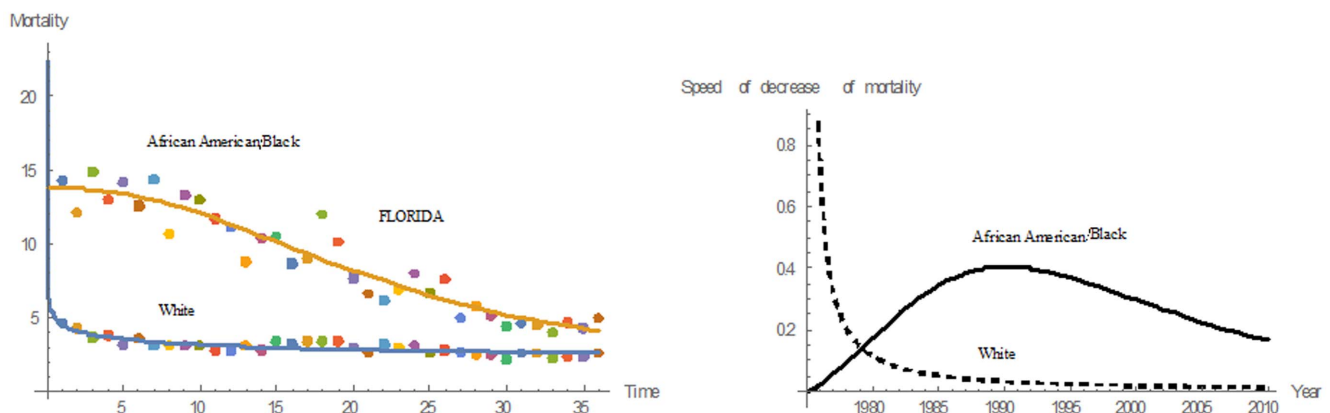

**Figure 8. Mean mortality rates, pace of decrease, and 3D histograms for Black and White women in Florida, 1975–2010.**  
doi:10.1371/journal.pone.0107242.g008

### Cervical Cancer in Georgia for African American/Black and White:1975-2010

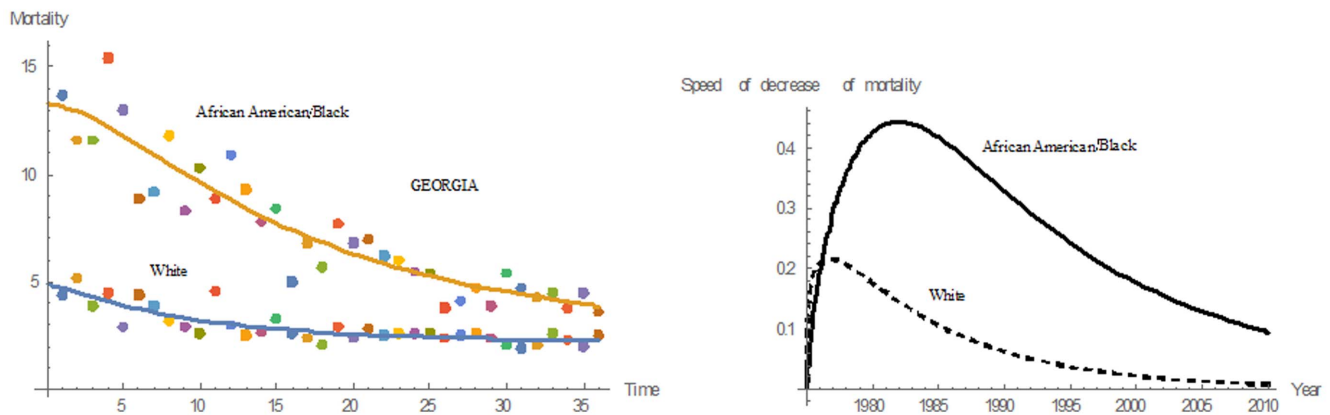

**Figure 9. Mean mortality rates, pace of decrease, and 3D histograms for Black and White women in Georgia, 1975–2010.**  
doi:10.1371/journal.pone.0107242.g009

**New York.** For 1975–2010, cervical cancer mortality rates for both Blacks and Whites in New York had downward trends (**Figure 14**). In 1975, the rate for Blacks was 13.4 and for Whites 4.4. In 2010, the rates were 3.2 and 2.0, respectively. In 1975, the mortality rate of Blacks was 3 times greater than that of Whites; in 2010, it was 1.6 times greater. From 1975 to 1984, the pace of decline in mortality for Whites was higher than that for Blacks. After 1984, the pace for Blacks was higher than that for Whites until 2010. In 1976, the pace of decline in mortality for Whites reached a maximum of 0.2490; for Blacks, the maximum pace of decline, 0.3040, occurred in 1988. The maximum mean mortality rate was 14.90, and the minimum was 3.20. The mean mortality rate for New York was 7.33, and the median mortality rate was 6.40. New York had the eleventh highest mean mortality rate for Blacks and the eleventh highest for Whites. Also, New York had the twelfth highest rate in mean pace of decline in mortality rate for Blacks and Whites.

**North Carolina.** North Carolina had a mean mortality rate of 8.45 and a median mortality rate of 8.15. Since 1975, the mortality rates for both races decreased (**Figure 15**). The mortality rate for Blacks was higher than that for Whites throughout the 36 years. In 1975, North Carolina had a mortality rate of 17.5 for Blacks and 4.9 for Whites. In 2010, the mortality

rates for Blacks and Whites were 3.7 and 1.6, respectively. Between 1975 and 2010, the cervical cancer mortality rate for Blacks decreased by 79% and that for Whites by 67%. In 1975, the cervical cancer mortality rate for Blacks was 3.57 times that for Whites; in 2010, the value was reduced to 2.31. Throughout 1975–2010, the pace of decline in mortality rates for Blacks remained above that for Whites. Relative to the other states, North Carolina had the seventh highest rate in cervical cancer mortality rate for Blacks and tenth highest for Whites. Also, North Carolina had the fourth highest rate in mean pace of decline in mortality for Blacks and eleventh highest for Whites.

**Pennsylvania.** Throughout the 36 years, Pennsylvania had decreasing cervical cancer mortality rates for both Blacks and Whites (**Figure 16**). The mean rates were 6.78 for Blacks and 2.92 for Whites. The corresponding median values were 8.15 for Blacks and 2.95 for Whites. In 1975, the mean mortality rate for Blacks was 9.7; in 2010, it was 3.9. In 1975, for Whites, the mean rate was 4.7; in 2010, it was 1.8. In 2010, the mean mortality rate for Blacks was 2.1 times that for Whites; in 2010, it was 2.2. During 1975–2010, Blacks had a higher pace of decline in cervical cancer mortality. The highest pace for Blacks was 0.736 in 1978. For Whites the maximum pace of decline was 0.126 in 1976.

### Cervical Cancer in Illinois for African American/Black and White:1975-2010

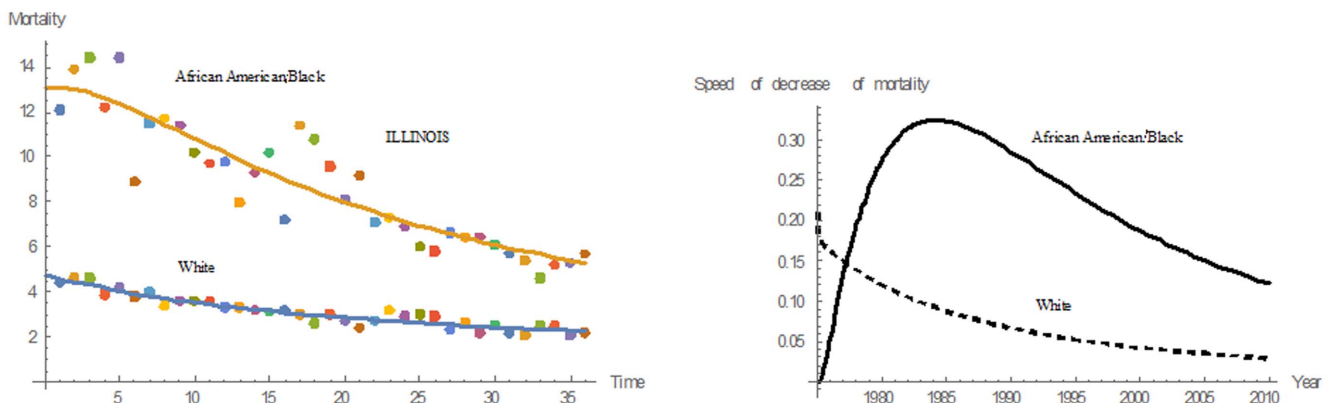

**Figure 10. Mean mortality rates, pace of decrease, and 3D histograms for Black and White women in Illinois, 1975–2010.**  
doi:10.1371/journal.pone.0107242.g010

## Cervical Cancer in Louisiana for African American/Black and White:1975-2010

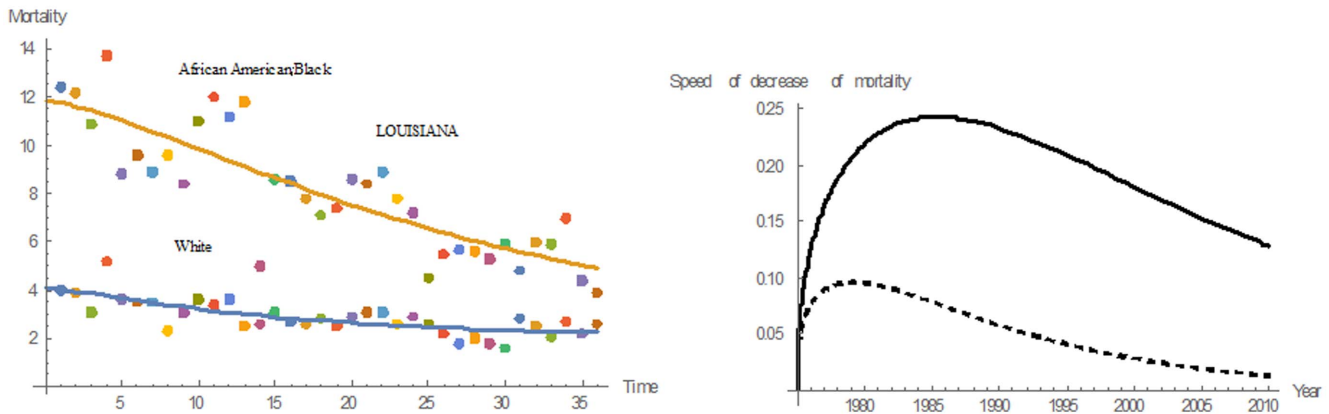

**Figure 11. Mean mortality rates, pace of decrease, and 3D histograms for Black and White women in Louisiana, 1975–2010.**  
doi:10.1371/journal.pone.0107242.g011

Relative to the other states, Pennsylvania had the thirteenth highest rate in cervical cancer mortality for Blacks and the ninth highest for Whites. Also, Pennsylvania had the second highest rate in mean pace of decline in cervical cancer mortality rate for Blacks and fourth highest for Whites.

**South Carolina.** For South Carolina, the mean cervical cancer mortality rates for Blacks and Whites over 36 years were 8.54 and 3.12, respectively, and the corresponding median values were 8.00 and 2.95, respectively. Both Blacks and Whites had declining mortality trends (**Figure 17**). In 1975, the mortality rate was 14.9 for Blacks and for 4.4 for Whites. In 2010, the rates were 4.3 for Blacks and 2.4 for Whites. During the 36 years, Blacks had a 71% reduction in their mortality rates, and Whites a 45% reduction. In 1975, the mortality rate for Blacks was 3.47 times that for Whites, but by 2010 this number was reduced to 1.79. In 1981, both Blacks and Whites had the same pace of decline, 0.0992. Prior to 1981, the pace of decline in cervical cancer mortality rate was higher for Whites than Blacks, but, after 1981, Blacks had a higher pace of decline. In 1994, the pace of decline was higher for Blacks. Relative to the other states, South Carolina had the sixth highest rate in cervical cancer mortality for Blacks and the fifth highest for Whites. Also, South Carolina had the

eleventh highest rate in mean pace of decline in cervical cancer mortality for Blacks and the ninth highest for Whites.

**Tennessee.** Over 36 years, Tennessee had the second highest cervical cancer mean mortality rate of 9.02 for Blacks and the highest rate (3.57) for Whites. Both races had declining mortality rates over this period (**Figure 18**). The median mortality rate for Blacks in Tennessee was 8.85, the highest among the 13 states. In 1975, Blacks had a mean mortality of 17.3; the corresponding number for the Whites was 6.00. By 2010, the mortality rates for Blacks and Whites had been reduced to 3.2 and 2.3, respectively. During the 36 years, the reductions in the mortality rates were 82% for Blacks and 62% for Whites. In 1975, Blacks had a mortality rate 2.88 times that for Whites. In 2010, this value was reduced to 1.60. During 1975–2010, the pace of decline in mortality for Blacks was higher than that for Whites. Both Blacks and Whites reached their highest pace of decline in 1982. For Blacks, the magnitude of pace was 1.6995; for Whites, it was 0.1277. Relative to the other states, Tennessee had the highest rate in mean pace of decline in cervical cancer mortality for Blacks and the fifth highest for Whites.

**Texas.** For Texas, both Blacks and Whites had declining rates of cervical cancer mortality for 1975–2010 (**Figure 19**). The

## Cervical Cancer in Maryland for African American/Black and White:1975-2010

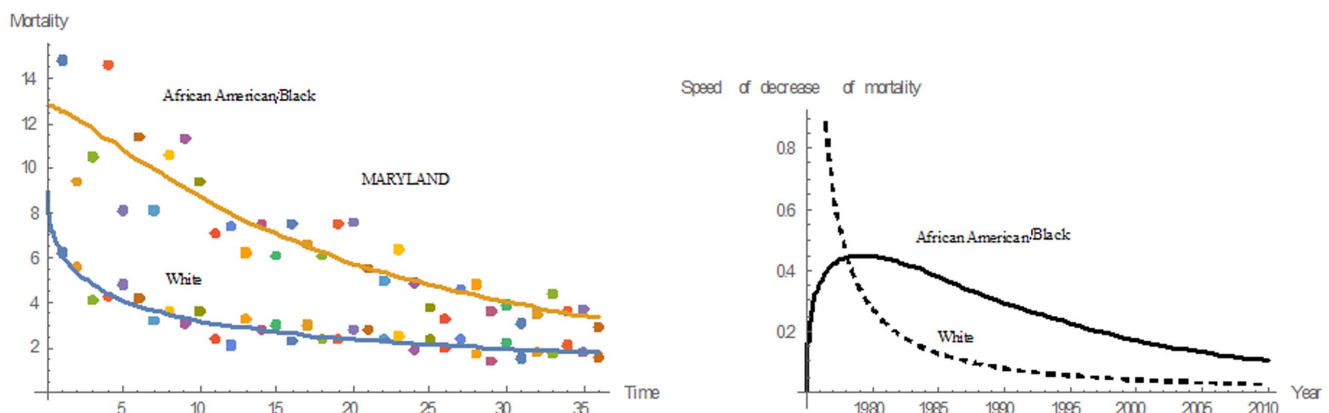

**Figure 12. Mean mortality rates, pace of decrease, and 3D histograms for Black and White women in Maryland, 1975–2010.**  
doi:10.1371/journal.pone.0107242.g012

### Cervical Cancer in Mississippi for African American/Black and White:1975-2010

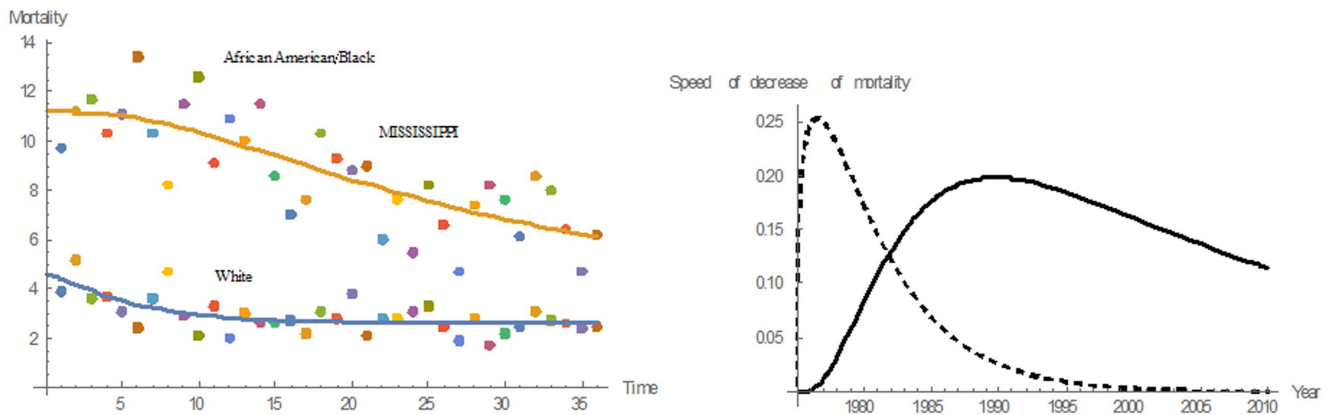

**Figure 13. Mean mortality rates, pace of decrease, and 3D histograms for Black and White women in Mississippi, 1975–2010.**  
doi:10.1371/journal.pone.0107242.g013

mean rate for Blacks was 7.67, and the median rate was 7.70. For Whites, the mean mortality rate was 3.45, and the median was 3.50. Texas had the highest median mortality rate for Blacks and the second highest mean mortality for Whites. In 1975, the rate for Blacks was 13.8 and 5.1 for Whites. In 2010, the rates for Blacks and Whites were reduced to 4.9 and 2.5, respectively. In 1975, the mortality rate for Blacks was 2.71 times that for Whites; in 2010, this value was reduced to 1.96. From 1975 to 2010, mortality rates for Blacks and Whites decreased by 64% and 5%, respectively. From 1975 to 1980, the pace of decline in mortality for Whites was higher than that for Blacks. In 1980, both had the same pace of decline of 0.1744. After 1980, the pace of decline for Blacks remained higher. The maximum pace of decline for Blacks was 0.2920, which occurred in 1990. Relative to the other states, Texas had the ninth highest rate in mean cervical cancer mortality for Blacks and the second highest for Whites. Also, the mean pace of decline in mortality was the eighth highest for Blacks and second highest for Whites.

#### Combined mortality for 13 states

For all states, in 1975 the cervical cancer mortality rate was 13.95 for Black women (Table 3) and 4.88 for White women (Table 4). In 2010, the rates for Black and White women were reduced to 4.20 and 2.24, respectively (Figure 20). The decrease for was 70% for Black women and 54% for White women. In 1975, the mortality rate for Black women was 2.86 times that for Whites, but in 2010 this value was reduced to 1.88. Throughout the 36 years, the cervical cancer mortality rate and the pace of decline in mortality rate for Black women remained higher than those for Whites. For Black women, the pace of decline increased until reaching a maximum of 0.40 in 1983. Afterwards, the pace decreased. For White women, the pace of decline increased until 1984, after which it decreased.

#### Discussion

These data reveal a racial disparity in survival rates for cervical cancer. These differences can be attributed to various factors, including biology, access to screening and treatment, stage of the disease at the time of diagnosis, late initiation of treatment, and exposure to risk factors (e.g., HPV infection). This disease is

### Cervical Cancer in New York for African American/Black and White:1975-2010

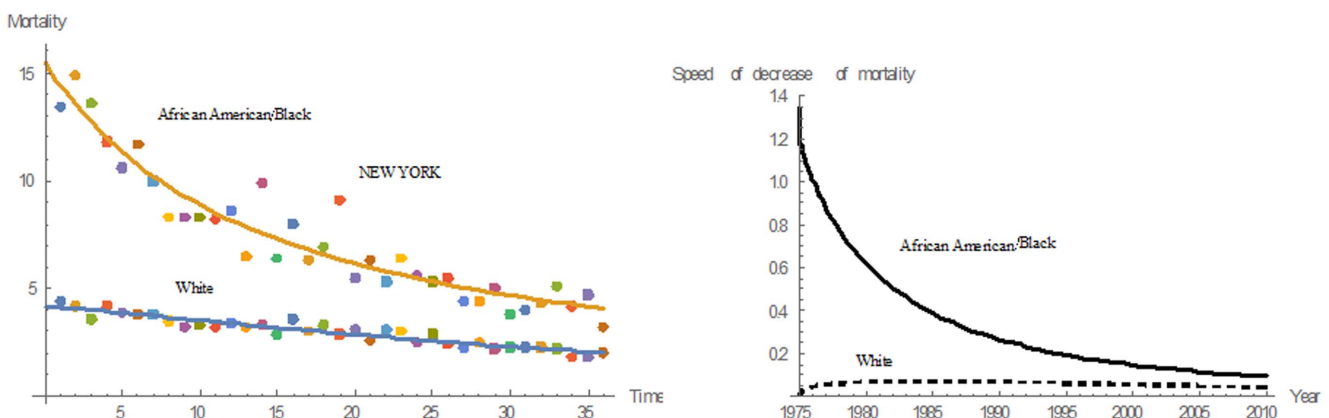

**Figure 14. Mean mortality rates, pace of decrease, and 3D histograms for Black and White women in New York, 1975–2010.**  
doi:10.1371/journal.pone.0107242.g014

### Cervical Cancer in North Carolina for African American/Black and White:1975-2010

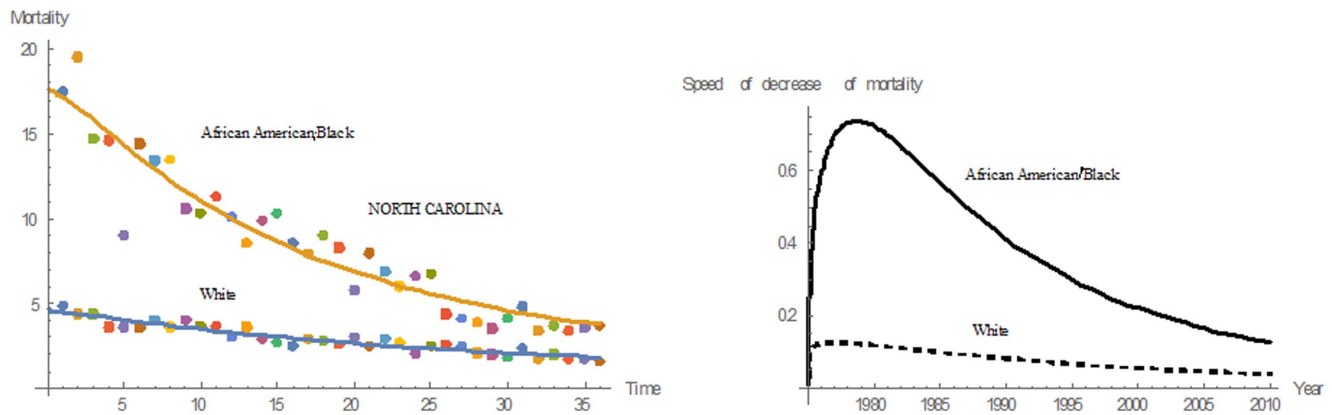

**Figure 15. Mean mortality rates, pace of decrease, and 3D histograms for Black and White women in North Carolina, 1975–2010.**  
doi:10.1371/journal.pone.0107242.g015

preventable and treatable, assuming appropriate screening and treatment of precancerous lesions. Considerable effort has been made to identify factors underlying the disparity. The efforts to improve outcomes for Black women with respect to cervical cancer have been partly successful in that survival rates have improved; however, a disparity still exists.

Virtually all cases of cervical cancer are caused by HPV infection, which can induce tumorigenesis. Almost all cervical cancer cases are due to infection from the HPV alpha genus [18], which includes the high-risk types, particularly HPV 16 and 18. Although HPV infection is common in the general population, most infections do not lead to cervical cancer, because HPV may require one or more “cofactors” to produce invasive cancer. A high viral load and persistent infection [19], genetics [22], immune response [18], smoking, long term oral contraceptive use and multiple sexual partners [20], a large number of pregnancies [24], and co-infection with sexually transmitted diseases, particularly *Chlamydia trachomatis* and HIV [21] are among the most relevant cofactors.

Approximately 7.5 million US women exhibit HPV infection, an overall rate of 26.8%, with the highest rate of 44.8% found among women 20 to 24 years old. Although a lower percentage of

these infections are the high-risk types [13]. Among those cases that become cancerous, the long period between the initial infection and tumor development provides ample time for screening and treatment. The success of the screening programs relate to their capacity to identify lesions in precancerous stages, or in the earliest stages of tumor development, and to the fact that treatments are highly effective and can often prevent development of cancers. Currently, with appropriate treatment, the 5-year survival rate approaches 100% [14]. The survival rates, however, decrease after the cervical carcinomas reach an advanced stage. Although, the survival rates vary among the published studies, they all follow the same trend [15]. Specifically, the survival rates are about 90% for women with stage I, less than 50% for stage II, and about 10% for stage III.

Pap smear testing, a screening process, is useful because it identifies and allows treatment of precancerous lesions or cancers in the earliest stages. It takes considerable time for the precancerous stages, referred as cervical intraepithelial neoplasia (CIN), to progress through stages CIN1, CIN2, and CIN3 before becoming invasive cervical cancer; further, 43% of CIN2 and 32% of CIN3 lesions regress and do not become cancerous [16]. A group of women with proper treatment experienced only 0.7% of

### Cervical Cancer in Pennsylvania for African American/Black and White:1975-2010

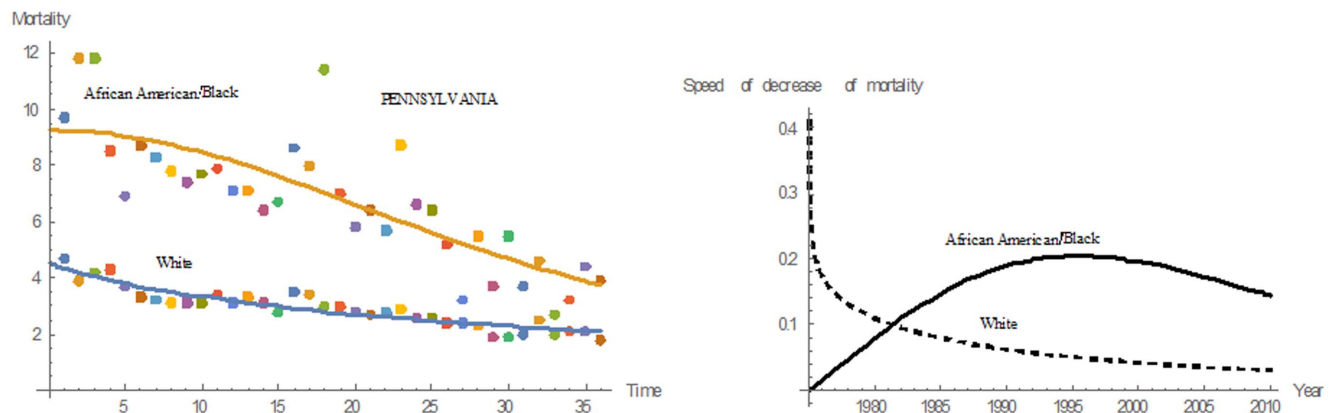

**Figure 16. Mean mortality rates, pace of decrease, and 3D histograms for Black and White women in Pennsylvania, 1975–2010.**  
doi:10.1371/journal.pone.0107242.g016

## Cervical Cancer in South Carolina for African American/Black and White:1975-2010

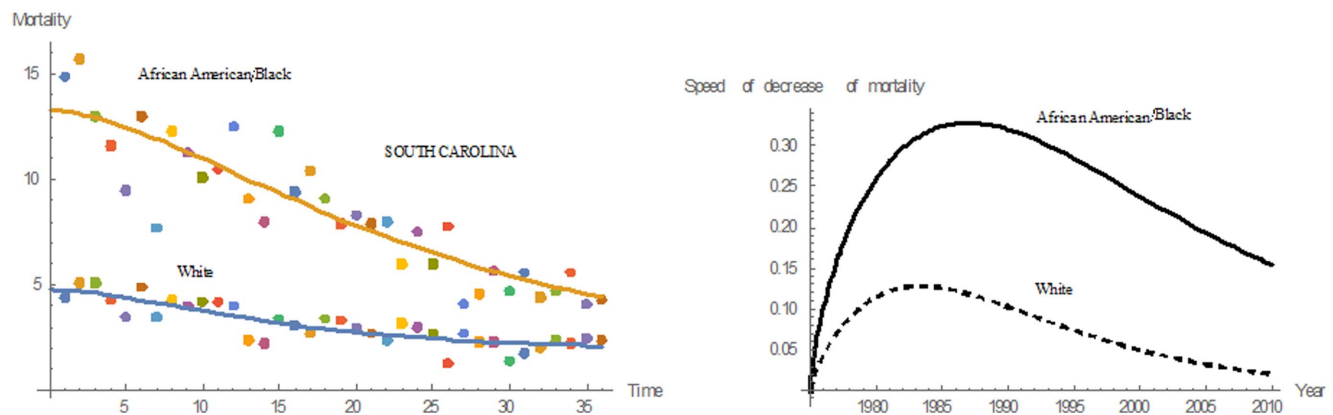

**Figure 17. Mean mortality rates, pace of decrease, and 3D histograms for Black and White women in South Carolina, 1975–2010.**  
doi:10.1371/journal.pone.0107242.g017

the CIN3 lesions becoming invasive cancers (within 30 years), as compared to 31% without treatment [17]. Thus, the screening programs allow for early detection and treatment and provide motivation to achieve full participation in the programs. As there are cases where screening is not used and invasive cervical cancer may develop, it is of value to consider what risk factors impact the progression of the precancerous lesions to the stage of invasive cancer.

The National Health Interview Survey has demonstrated that, in regard to screening, socioeconomic status, income, and education are more relevant than race and ethnicity [26]. Due to the nature of the disease and the treatment, differences in mortality arise largely from late stage at presentation, a factor related to failure in screening. The racial, ethnic, and socioeconomic disparities in cervical cancer survival can be explained by late-stage presentation and less than effective treatment [27]. The difference in survival between Black and White women apparently does not originate in biological differences but rather in exposure to HPV and access to screening and treatment. In a stage-for-stage comparison, there are no differences in survival [28], and, with equal treatment, survival is independent of race [29,30]. Further,

race is not an independent prognostic factor for the response of cervical cancer patients to radiation therapy [31].

A late presentation of the disease, leading to excessive mortality, should be considered a failure of the screening process [15]. The higher rates of HPV infection and mortality among the lower socioeconomic classes result from a complex interaction of numerous causes, some of which are not fully understood. Efforts have been made to clarify the reasons for under-coverage of certain segments of the population and to determine solutions that will improve outcomes [32,33]. The differences in access to screening and treatment between socioeconomic classes directly impact survival [34] and point to the need to address the disparity in insurance and access to service. These issues are magnified by some patients refusal of treatment and failure to follow the treatment plan [15] and by distrust or cultural issues related to screening and treatment [35].

Due to various factors, Black women are less likely to receive surgical treatment [27,36,37]. Knowledge of risk can also be an issue, as detailed in a subset of the population with high risk but without screening and without awareness of risk [38]. The lower socioeconomic classes also have higher incidences of comorbid conditions [27,35], which not only increase the risk of progression

## Cervical Cancer in Tennessee for African American/Black and White:1975-2010

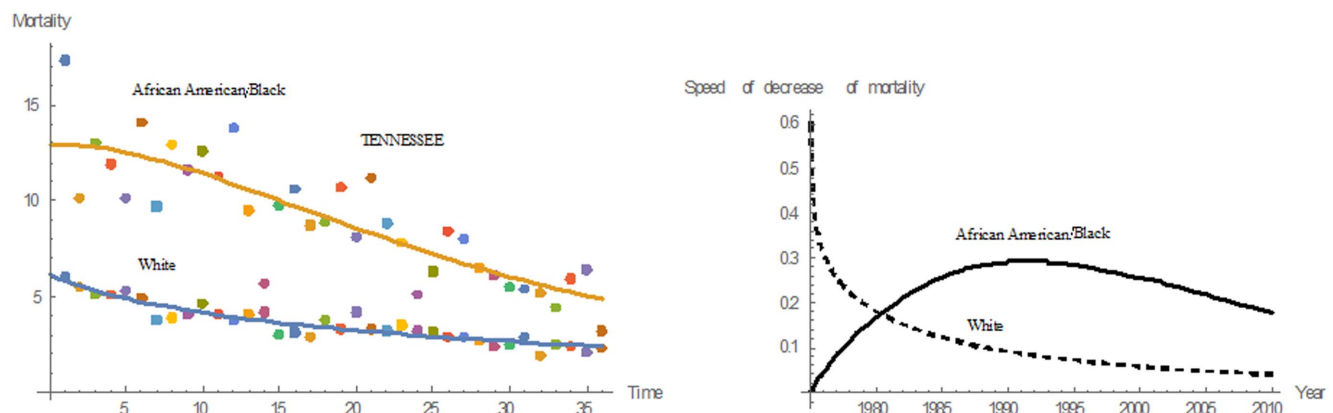

**Figure 18. Mean mortality rates, pace of decrease, and 3D histograms for Black and White women in Tennessee, 1975–2010.**  
doi:10.1371/journal.pone.0107242.g018

### Cervical Cancer in Texas for African American/Black and White:1975-2010

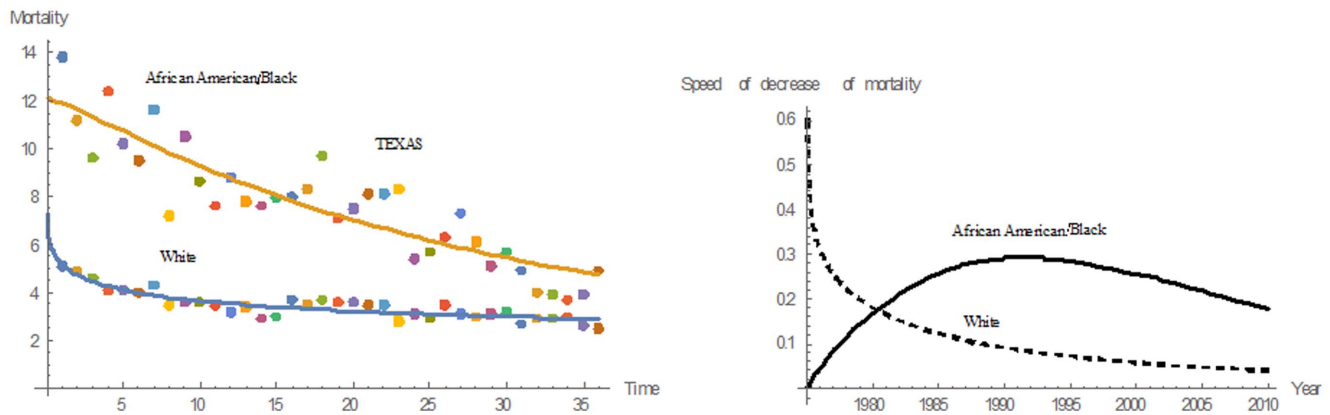

**Figure 19. Mean mortality rates, pace of decrease, and 3D histograms for Black and White women in Texas, 1975–2010.**  
doi:10.1371/journal.pone.0107242.g019

of the disease but also lead to lower screening rates [39]. Differences in the prevalence of HPV DNA among different geographical regions and different segments of the population within a region have particular relevance [40]. Within this issue, there is interaction between our study of the variable of race and our longitudinal study among the different states. Nevertheless, further studies are necessary to determine gradients in rates of incidence, stage, and mortality over geographic regions and the relation of race, ethnicity, and socioeconomics in order to design better screening and treatment strategies [41].

This aspect of our statistical/mathematical model, treating the gradient of the racial difference in the mortality rate with respect to different geographical regions, allows for interpretations regarding the source of the regional variation in this disparity. One interpretation is that the underlying socioeconomic disparities

corresponding to the racial differences operate at different levels in these different regions [40]. Also relevant is the observation that regional variation in the prevalence of HPV DNA is associated with these differences [40]. The SEER data indicates distinct regional differences in infection and mortality rates, with Delaware, Florida, Louisiana, Mississippi, Oklahoma, and West Virginia exhibiting poor performance for both of these measures [11].

The racial and ethnic disparities for cervical cancer are of concern for issues of equity and fairness, for issues of how to improve treatment, and for identifying regions where efforts to combat cervical cancer are more or less effective. These disparities and socioeconomic factors extend to the other gynecological cancers and to other types of cancers [42,43,44]. Equity and removal of disparities are a concern within the healthcare system

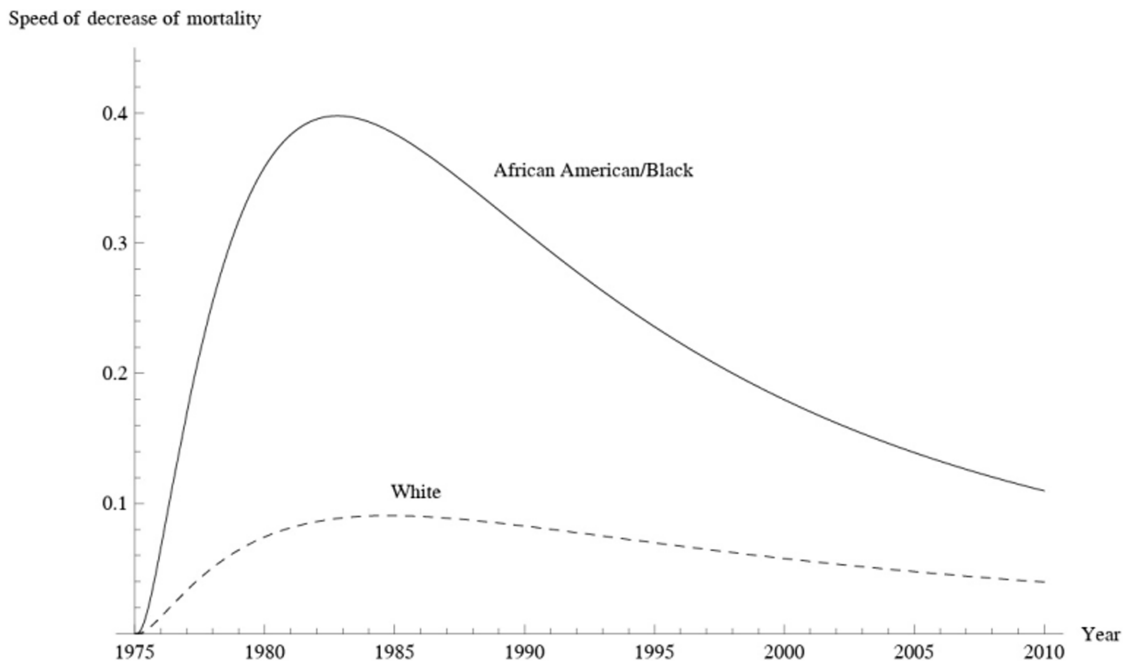

**Figure 20. Corresponding pace of decrease in mortality for Black and White women as determined by the generalized H2 model.**  
doi:10.1371/journal.pone.0107242.g020



[45,46,47]. The case of cervical cancer calls for attention to disparities since effective screening and treatment exist, and the associated suffering, costs, and mortality should be avoidable. There is an overlap with preventive medicine, the most efficient and desirable form of medicine. A goal will be to use these models to understand the source of the racial disparity for survival in cervical cancer. Since HPV infections and cervical cancer are preventable and treatable, success will be achieved by distributing the screening and treatments to all segments of the U.S. population.

Although there are numerous causes for disparities, including socioeconomics, the present results address the pace of decline in cervical cancer mortality across states and its relation to racial disparities. Similar, and even greater, disparities exist on the global scene. Doctors and health officials have made progress and continue to address these disparities within the U.S. population; still, the approach should be extended globally.

We note that screening programs instituted in the U.S. and other developed countries have been highly effective and have avoided much suffering and loss of life, including an estimated 6,000 lives per year in the U.K. [48]. Most of the burden of cervical cancer is in developing countries, where it ranks first or second among cancers for women; in developed countries, it is not in the top five [49,50]. Of the 528,000 new cases each year, 70% to 80% occur in developing countries [15,51]. Rates in India and in African countries can be ten to twenty times higher [52]. The ravages of cervical cancer in these countries can be attributed primarily to the lack of screening [15]. While an overall goal within medicine includes extending to the larger world increases in survival and life quality from medical advances in developed countries, this case should be of particular relevance due to significant differences in outcomes and relative ease of treatment. For instance, the suggestion to extend current cancer control knowledge to the lowest socioeconomic bracket [42] is relevant in regard to lives that can be saved in the developing world. Two vaccines, Gardasil and Cervarix, have been developed for use in the U.S., and, if accomplished, utilization of these vaccines worldwide is estimated to reduce cases of cervical cancer up to 70% [53].

Despite overall decline in mortality, Black women continue to have higher mortality rates from cervical cancer than White

women. The disparity in mortality may be related to poverty, lack of education, and socioeconomic factors. A report by the Centers for Disease Control and Prevention [54] indicates that, from 2000 through 2008, the percentage of Black women ages 18 years or older who had a Pap test in the last three years was higher than that for Whites. This may be a reason for the faster decline in cervical cancer mortality rate for Black women. Early detection through screening is a factor in increasing the pace of decline in cervical cancer mortality; direct consequences are the reductions in mortality rates for both races and a reduction of racial disparities. We believe that individual states should promote cervical cancer screening through effective media, such as television, and thereby encourage women to be screened for cervical cancer. Such promotions can increase cervical cancer awareness and point out the risks of inaction. To have the most impact on encouraging women to schedule regular cervical cancer screenings, the promotions should be prepared jointly by public health and marketing professionals.

## Conclusions

The results of the present study show that disparities exist for cervical cancer. Although Black women have higher mortality rates, the pace of decline in their mortality is higher than that for White women. This increase in pace, if sustained, will reduce the racial disparities in cervical cancer. Public health officials should monitor progress toward elimination of these disparities.

## Acknowledgments

We thank Dr. Donald L. Hill, Division of Preventive Medicine, University of Alabama at Birmingham, AL, for his critical review of this manuscript. We also thank Mrs. Laura Gallitz, Division of Preventive Medicine, University of Alabama at Birmingham, AL, for her proofreading. The content is solely the responsibility of the authors and does not necessarily represent the official views of the National Institutes of Health.

## Author Contributions

Conceived and designed the experiments: MAT WME SB KPS. Analyzed the data: MAT JJKK WME JTG SB KPS. Contributed to the writing of the manuscript: MAT JJKK WME SB UM MF EEP KPS. Planning, execution, and interpretation of data: MF SB UM EEP KPS.

## References

- Fenelon A (2013) An examination of black/white differences in rate of age-related mortality increase. *Demogr Res* 29:41–72.
- Pong-Wong R, Hadjipavlou G (2010) A two-step approach combining the Gompertz growth model with genomic selection for longitudinal data. [Abstract] *BMC Proc* 4:S4.
- Novák L, Kukla L, Čuta M (2008) Child and adolescent longitudinal growth data evaluation using logistic curve fitting with the use of dynamic phenotype method. *Scripta Medica (BRNO)* 81:31–46.
- Aggrey SE (2009) Logistic nonlinear mixed effects models for estimating growth parameters. *Poult Sci* 88:276–280.
- Li Y, Jiang L (2013) Fitting logistic growth curve with nonlinear mixed-effects models. *Adv J Food Sci Technol* 5:392–397.
- Tabatabai M, Williams DK, Bursac Z (2005) Hyperbolic growth models: Theory and application. *Theor Biol Med Model* 2:14.
- Eby W, Tabatabai M, Bursac Z (2010) Hyperbolic modeling of tumor growth with a combined treatment of iodoacetate and dimethylsulfoxide. *BMC Cancer* 10:509.
- Tabatabai M, Bursac Z, Eby W, Singh K (2011) Mathematical modeling of stem cell proliferation. *Med Biol Eng Comp* 49:253–262.
- Tabatabai M, Eby W, Singh KP (2011) Hyperbolic modeling of wound healing. *Math Comput Model* 53:755–768.
- Tabatabai M, Eby W, Bae S, Singh KP (2013) A flexible multivariable model for phytoplankton growth. *Math Biosci Engineer* 10:913–923.
- Howlader N, Noone AM, Krapcho M, Garshell J, Neyman N, et al (eds) SEER Cancer Statistics Review 1975–2010. National Cancer Institute. Bethesda, MD, [http://seer.cancer.gov/csr/1975\\_2010/](http://seer.cancer.gov/csr/1975_2010/), based on November 2012 SEER data submission, posted to the SEER web site, April 2013.
- Downs LS, Smith JS, Scarinci I, Flowers L, Parham G (2008) The disparity of cervical cancer in diverse populations. *Gynecol Oncol* 109:S22–S30.
- Dunne EF, Unger ER, Sternberg M, McQuillan G, Swan DC, et al (2007) Prevalence of HPV infection among females in the US. *JAMA* 297:813–819.
- Cherath L, Alic M. Gale Encyclopedia of Cancer: Cervical Cancer 2002. [http://www.encyclopedia.com/topic/Cervical\\_Cancer.aspx](http://www.encyclopedia.com/topic/Cervical_Cancer.aspx).
- Garner E (2003) Cervical cancer: Disparities in screening, treatment, and survival. *Cancer Epidemiol Biomarkers Prev* 12:242s–247s.
- Vesco KK, Whitlock EP, Eder M, Burda BU, Senger CA, et al (2011) Risk factors and other epidemiologic considerations for cervical cancer screening: A narrative review for the U.S. Preventive Services Task Force. *Ann Intern Med* 155:698–706.
- McCredie MR, Sharples KJ, Paul C, Baranyai J, Medley G, et al (2008) Natural history of cervical neoplasia and risk of invasive cancer in women with cervical intraepithelial neoplasia 3: a retrospective cohort study. *Lancet Oncol* 9:425–434.
- International Agency for Research on Cancer, Monographs Vol 90. Human Papillomaviruses, 4. Molecular Mechanisms of HPV-Induced carcinogenesis, 2007, 432–465.
- Dalstein V, Riethmuller D, Prétet JL, Le Bail Carval K, Sautière JL, et al (2003) Persistence and load of high-risk HPV are predictors for development of high-grade cervical lesions: a longitudinal French cohort study. *Int J Cancer* 106:396–403.
- Castellsagué X, Muñoz N. (2003) Chapter 3: Cofactors in human papillomavirus carcinogenesis—role of parity, oral contraceptives, and tobacco smoking. *J Natl Cancer Inst Monogr* 31:20–28.

21. Dahlström LA, Andersson K, Luostarinen T, Thoresen S, Ögmundsdóttir H, et al (2011) Prospective seroepidemiologic study of human papillomavirus and other risk factors in cervical cancer. *Cancer Epidemiol Biomarkers Prev*, 20:2541–2550.
22. Chattopadhyay K (2011) A comprehensive review on host genetic susceptibility to human papillomavirus infection and progression to cervical cancer. *Ind J Human Genetics* 17:132–144.
23. Ragasukha PN, Thulasiedharan JV, Wesley R, Jayaprakash PG, Lalitha P, et al (2012) A case-control nutrigenomic study of the synergistic activity of folate and vitamin B12 in cervical cancer progression. *Nutr Cancer* 64:550–558.
24. Bosch FX, de Sanjosé S (2007) The epidemiology of human papillomavirus and cervical cancer. *Dis Markers* 23:213–227.
25. Brooks SE, Chen TT, Ghosh A, Mullins CD, Gardner JF, et al (2000) Cervical cancer outcomes analysis: impact of age, race and comorbid illness on hospitalizations for invasive carcinoma of the cervical cancer. *Gynecol Oncol* 79:107–115.
26. Breen N, Wagener DK, Brown ML, Davis WW, Ballard-Barbash R (2001) Progress in cancer screening for the 1987, 1992, 1998 National Health Interview surveys. *J Natl Cancer Inst* 93:1704–1713.
27. Brookfield KF, Cheung MC, Lucci J, Fleming LE, Koniaris LG (2009) Disparities in survival among women with invasive cervical cancer. *Cancer* 115:166–178.
28. Morgan MA, Behbakht K, Benjamin I, Berlin M, King SA, et al (1996) Racial differences in survival from gynecologic cancer. *Obstet Gynecol* 88:914–918.
29. Farley JH, Hines JF, Taylor RR, Carlson JW, Parker MF, et al (2001) Equal care ensures equal survival for African-American women with cervical carcinoma. *Cancer* 91:869–873.
30. Grigsby PW, Hall-Daniels L, Baker S, Perez CA (2000) Comparison of clinical outcome in black and white women treated with radiotherapy for cervical carcinoma. *Gynecol Oncol* 79:357–361.
31. Mundt AM, Connell PP, Campbell T, Hwang JH, Rotmensch J, et al (1998) Race and clinical outcome in patients with carcinoma of the uterine cervical cancer treated with radiation therapy. *Gynecol Oncol* 71:151–158.
32. Shavers VL, Brown ML (2002) Racial and ethnic disparities in the receipt of cancer treatment. *J Natl Cancer Inst* 94:334–357.
33. Bazargan M, Bazargan SH, Farooq M, Baker RS (2004) Correlates of cervical cancer screening among underserved Hispanic and African-American women. *Prev Med* 39:465–473.
34. Adams EK, Breen N, Joski PJ (2007) Impact of the national breast and cervical cancer early detection program on mammography and pap test utilization among white, Hispanic, and African American women: 1996–2000. *Cancer* 109:348–358.
35. Hicks ML, Yap OW, Matthews R, Parham G (2006) Disparities in cervical cancer screening, treatment and outcomes. *Ethn Dis* 16:63–6.
36. Howell EA, Chen YT, Concato J (1999) Differences in cervical cancer mortality among black and white women. *Obstet Gynecol* 94:509–515.
37. Merrill RM, Merrill AV, Mayer LS (2000) Factors associated with no surgery or radiation therapy for invasive cervical cancer in black and white women. *Ethn Dis* 10:248–56.
38. Matthews AK, Li CC, Ross N, Ram J, Ramsey R, et al (2013) Breast and cervical cancer screening behaviors of African American sexual minority women. *J Gen Pract* 1:107.
39. Kiefe CI, Funkhouser E, Fouad MN, May DS (1998) Chronic disease as a barrier to breast and cervical cancer screening. *J Gen Intern Med* 13:357–365.
40. Parikh S, Brennan P, Boffetta P (2003) Meta-analysis of social inequality and the risk of cervical cancer. *Int J Cancer* 105:687–691.
41. Singh GK, Miller BA, Hankey BF, Edwards BK (2004) Persistent area socioeconomic disparities in U.S. incidence of cervical cancer, mortality, stage, and survival, 1975–2000. *Cancer* 101:1051–1057.
42. Siegel R, Ward E, Brawley O, Jemal A (2011) Cancer statistics 2011: The impact of eliminating socioeconomic and racial disparities on premature cancer deaths. *Ca Cancer J Clin* 61:212–236.
43. Tehranifar P, Neugut AI, Phelan JC, Link BG, Liao Y, et al (2009) Medical advances and racial/ethnic disparities in cancer survival. *Cancer Epidemiol Biomarkers Prev* 18:2701–2708.
44. Ward E (2004) Cancer disparities by race/ethnicity and socioeconomic status. *CA Cancer J Clin* 54:78–93.
45. Braveman PA, Cubbin C, Egerter S, Williams DR, Pamuk E (2010) Socioeconomic disparities in health in the United States: What the patterns tell us. *Am J Public Health* 100:S186–S196.
46. Krieger N, Rowley DL, Herman AA, Avery B, Phillips MT (1993) Racism, sexism, and social class: implications for studies of health, disease, and well-being. *Am J Prev Med* 9:82–122.
47. Lantz PM, Lynch JW, House JS, Lepkowski JM, Mero RP, et al (2001) Socioeconomic disparities in health change in a longitudinal study of US adults: the role of health-risk behaviors. *Social Sci Med* 53:29–40.
48. Peto J, Gilham C, Fletcher O, Matthews FE (2004) The cervical cancer epidemic that screening has prevented in the UK. *Lancet* 364:249–256.
49. Shanta V, Krishnamurthi S, Gajalakshmi CK, Swaminathan R, Ravichandran K (2000) Epidemiology of cancer of the cervical cancer: global and national perspective. *J Indian Med Assoc* 98:49–52.
50. de Sanjose S, Bosch FX, Munoz N, Shah K (1997) Social differences in sexual behavior and cervical cancer. *IARC Sci Publ* 138:309–317.
51. Bray F, Ren JS, Masuyer E, Ferlay J (2013) Global estimates of cancer prevalence for 27 sites in the adult population in 2008. *Int J Cancer* 132:1133–1145.
52. Singh GK, Azuine RE, Siahpush M (2012) Global inequalities in cervical cancer incidence and mortality are linked to deprivation, low socioeconomic status, and human development. *Int J MCH AIDS* 1:17–30.
53. Schiffman MA, Wacholder S (2012) Success of HPV vaccination is now a matter of coverage. *Lancet Oncol* 13:10–12.
54. National Center for Health Statistics Health, United States, 2009. ([http://www.cdc.gov/nchs/data/09.pdf](http://www.cdc.gov/nchs/data/hus/09.pdf)).
